# Supplementary material for: Identification of Reference Genes for RT-qPCR Analysis in Gleditsia microphylla under Abiotic Stress and Hormone Treatment
Source: MDPI journal article supplement (doi:10.3390/genes13071227), 2022-07-10
Supplement: s1 [file s1]

Cold

Average expression stability values of remaining control genes

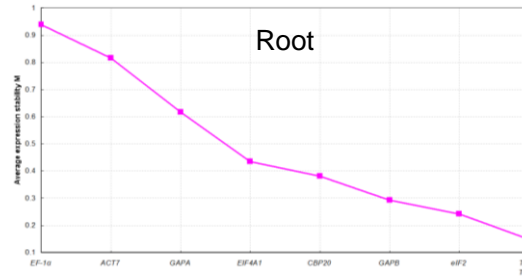

Average expression stability values of remaining control genes

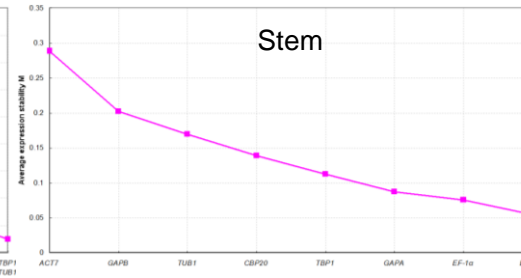

Average expression stability values of remaining control genes

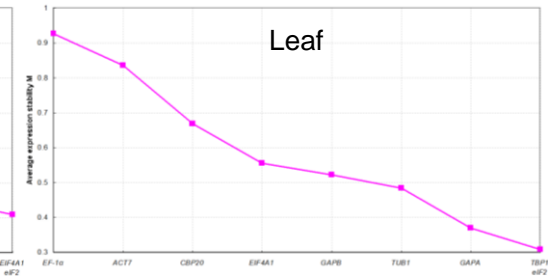

Heat

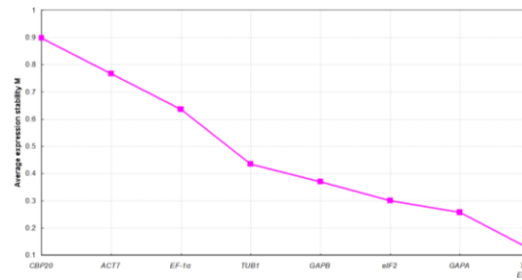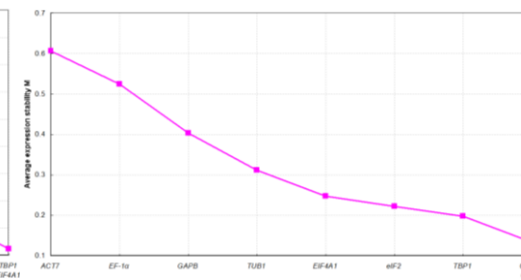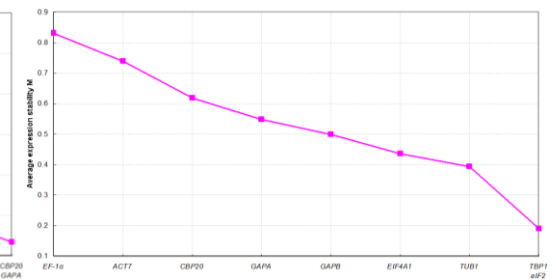

PEG

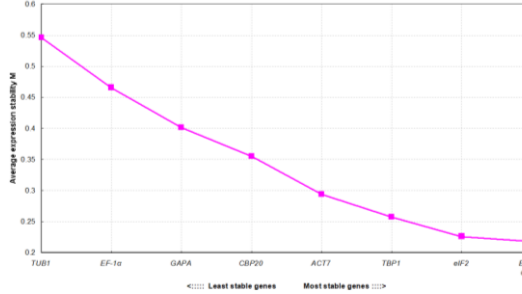

<: Least stable genes      Most stable genes >:

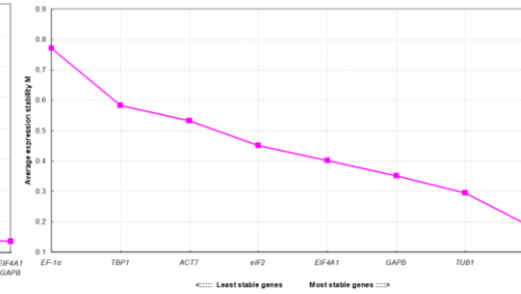

<: Least stable genes      Most stable genes >:

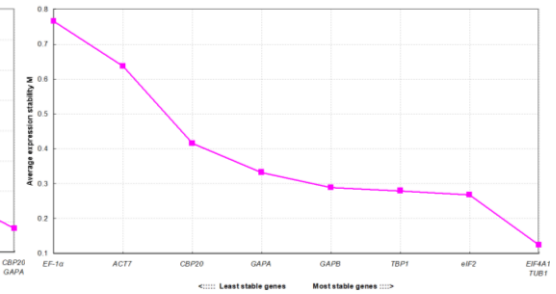

<: Least stable genes      Most stable genes >:

CuSO<sub>4</sub>

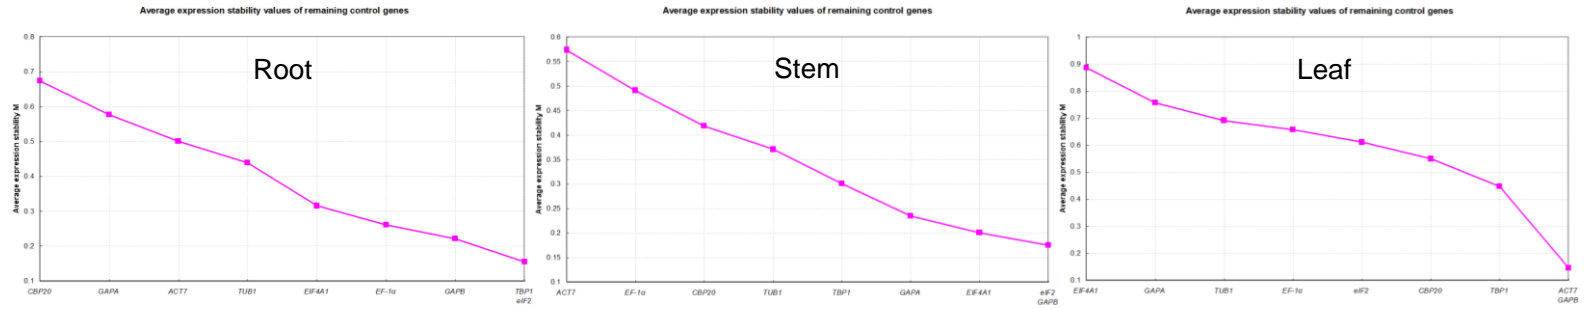

NaCl

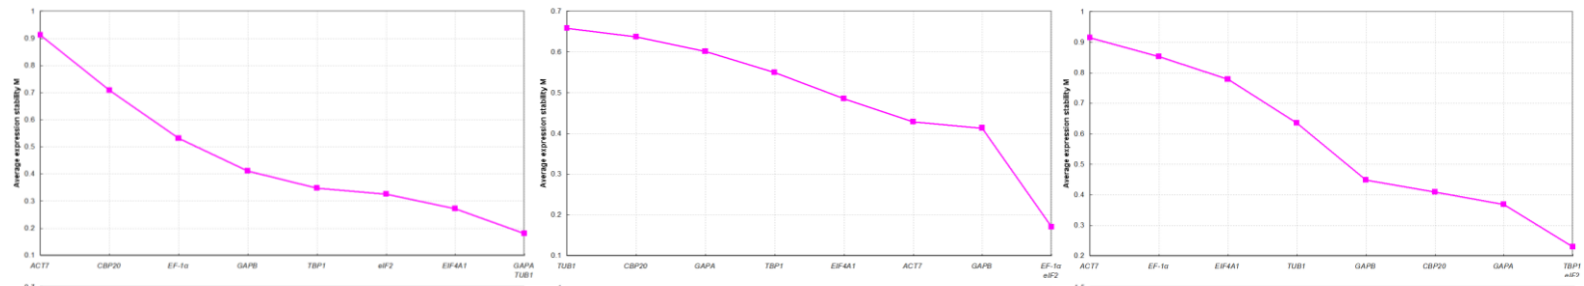

ABA

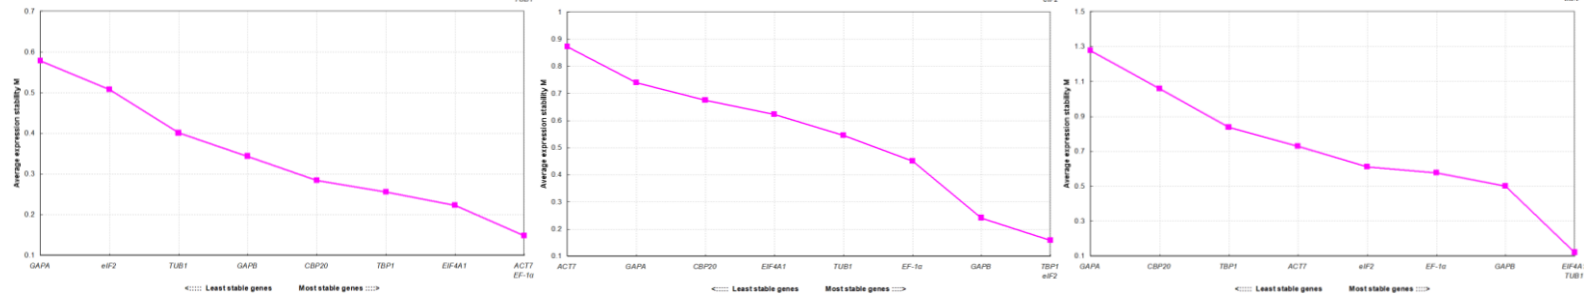

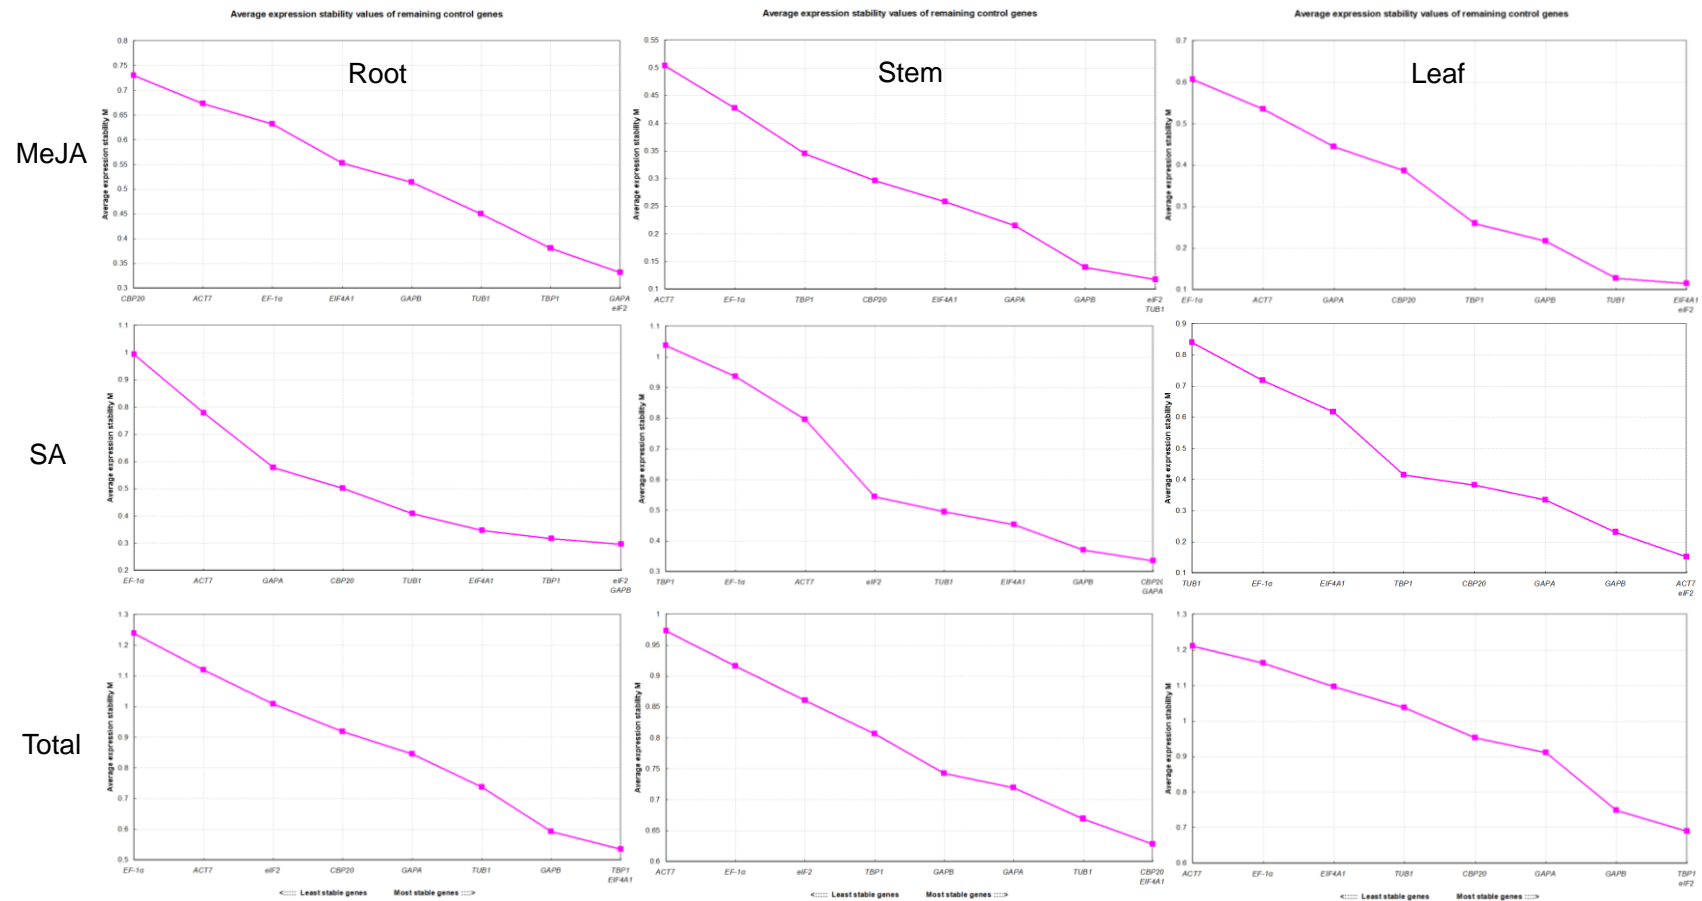

Tissue

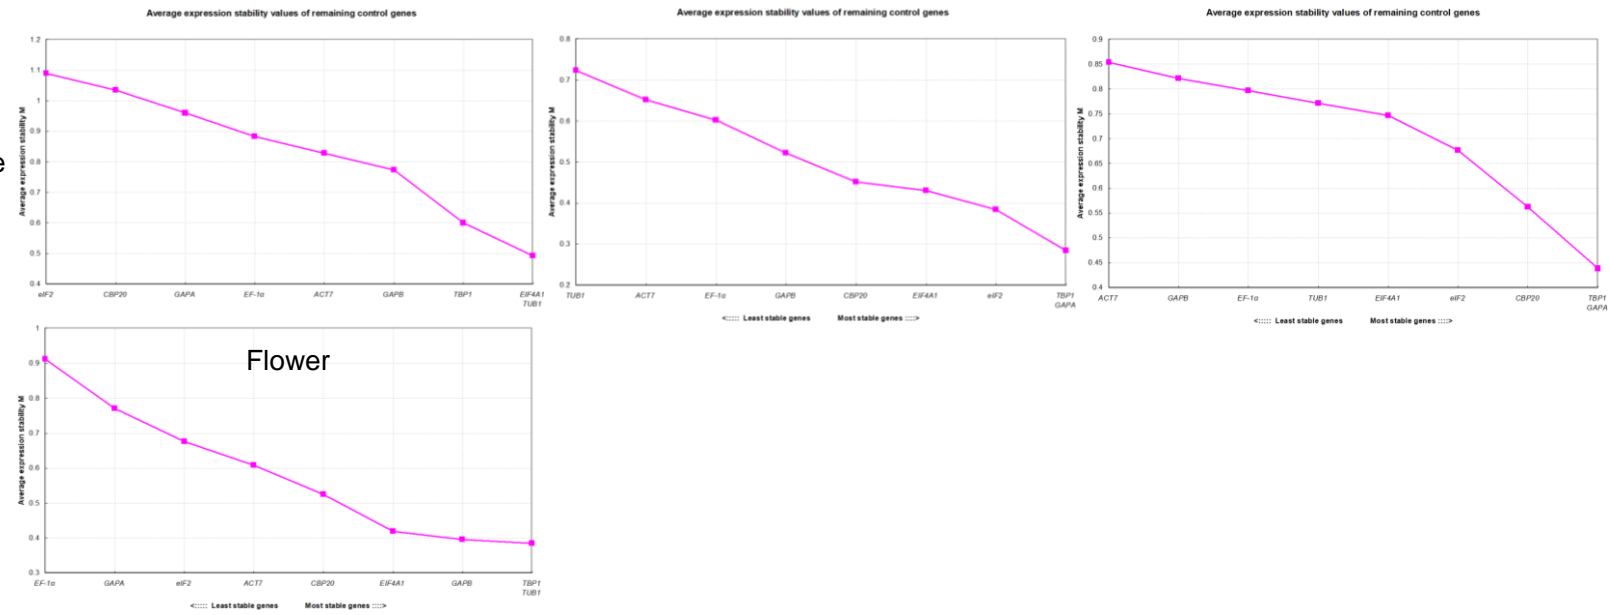

**Figure S3.** Average expression stability M value of nine candidate reference genes calculated using GeNorm by organ.
