# Supplementary material for: Identification of Reference Genes for RT-qPCR Analysis in Gleditsia microphylla under Abiotic Stress and Hormone Treatment
Source: MDPI journal article supplement (doi:10.3390/genes13071227), 2022-07-10
Supplement: s1 [file s1]

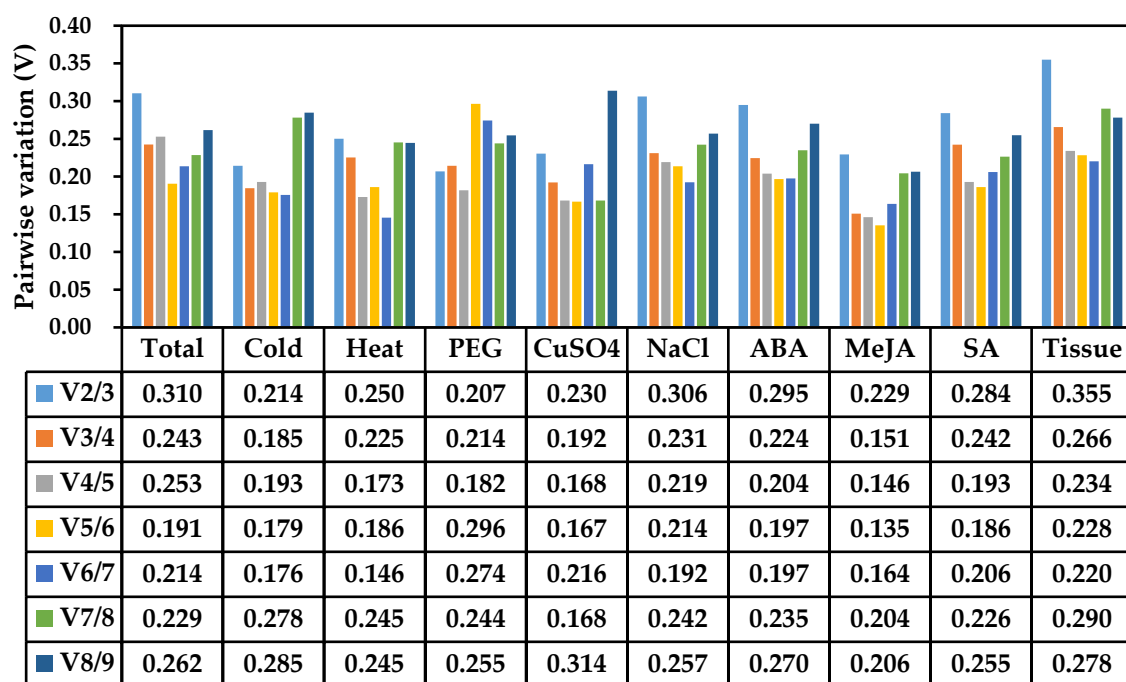

**Figure S4.** The pairwise variation (V) measure of the nine candidate reference genes using GeNorm by group.  $V_n/V_{n+1}$  values were used to calculate the optimal number of reference genes (n).
