# Supplementary material for: Identification of Reference Genes for RT-qPCR Analysis in Gleditsia microphylla under Abiotic Stress and Hormone Treatment
Source: MDPI journal article supplement (doi:10.3390/genes13071227), 2022-07-10
Supplement: s1 [file s1]

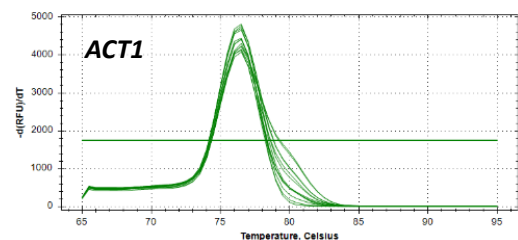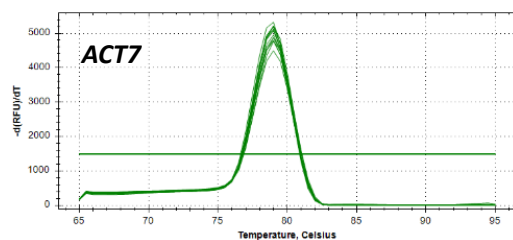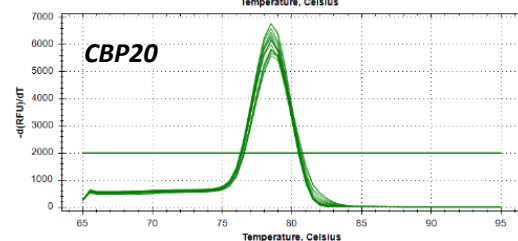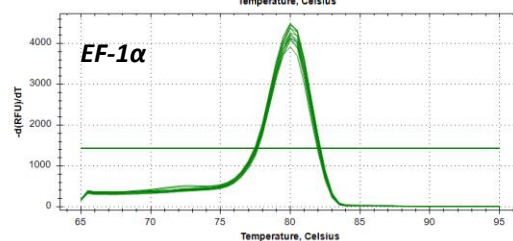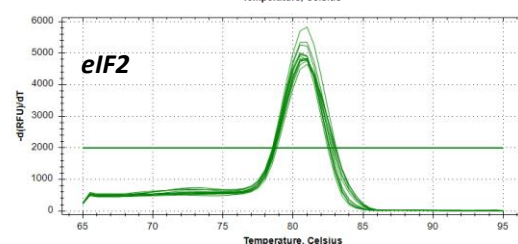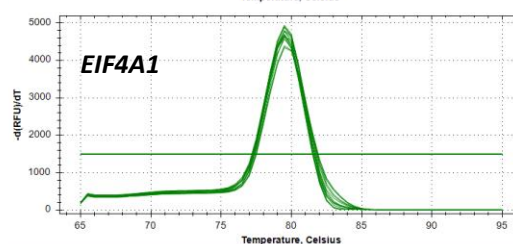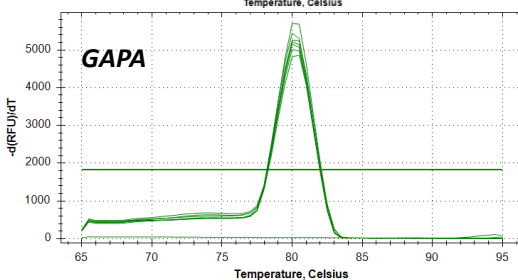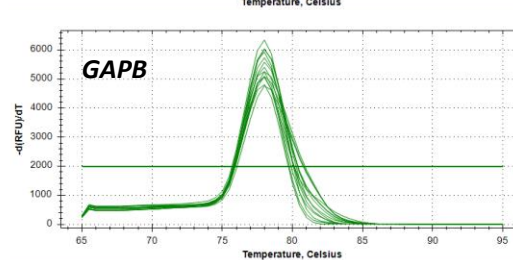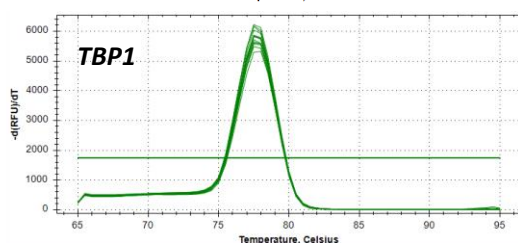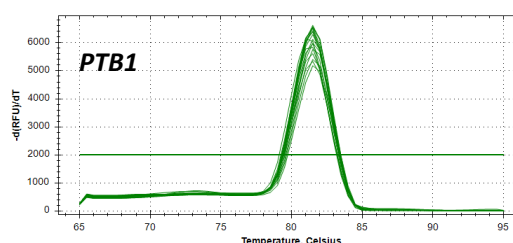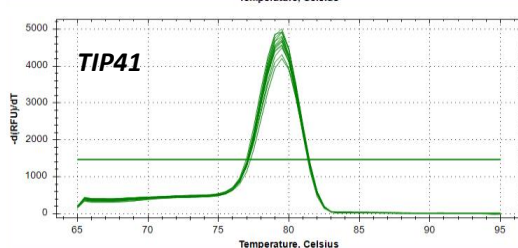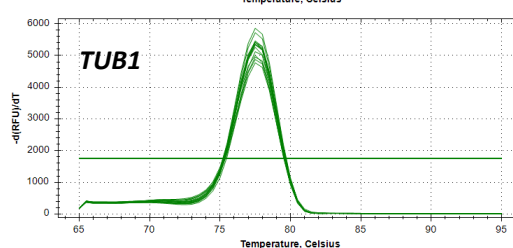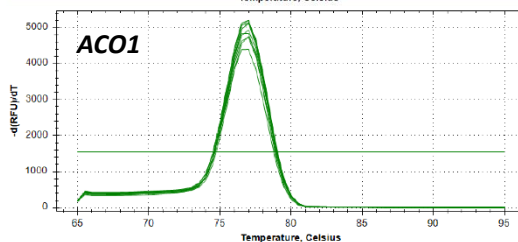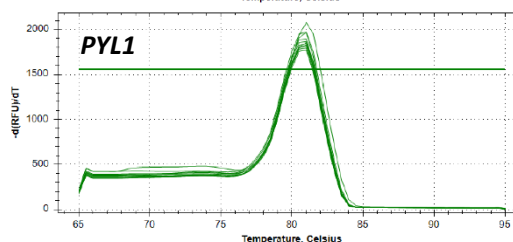

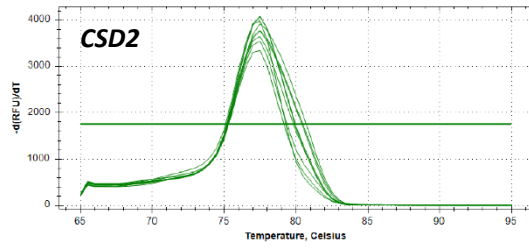

**Figure S1.** Melting curves for the candidate reference genes and target genes. Melting temperatures were visualized by plotting the negative first derivative of fluorescence relative to the temperature in Celsius ( $-(d/dT)$ ). Melting curves of twelve candidate reference genes and three target genes show a simple peak.
