# Supplementary material for: Identification of Reference Genes for RT-qPCR Analysis in Gleditsia microphylla under Abiotic Stress and Hormone Treatment
Source: MDPI journal article supplement (doi:10.3390/genes13071227), 2022-07-10
Supplement: s1 [file s1]

**Table S1.** Information of candidate reference genes, target genes and primers for RT-qPCR.

| Gene name <sup>a</sup> | Description                                        | Primer Sequence (5'-3')<br>(For./Rev.)              | Amplicon length<br>(bp)/Tm (°C) | PCR<br>efficiency<br>(E) | Correlation<br>coefficient<br>(R <sup>2</sup> ) | GenBank<br>Accession <sup>b</sup> |
|------------------------|----------------------------------------------------|-----------------------------------------------------|---------------------------------|--------------------------|-------------------------------------------------|-----------------------------------|
| <i>TBP1</i>            | TATA binding protein 1                             | CGGAGTACAATCCCAAGCGT/<br>AGCATACTTCCTTGCTGCCAA      | 146/77.5                        | 93.30                    | 0.997                                           | MZ210062                          |
| <i>CBP20</i>           | Nuclear cap binding protein 20                     | AGCTATGCCACCGTCCTATG/<br>ACCACTCTCCCCGAAATCGC       | 208/78.5                        | 118.60                   | 0.982                                           | MZ210063,<br>MZ210064             |
| <i>TIP41</i>           | TIP41-like family protein                          | TCTTCTCTTGCATTCTGGCTT/<br>GGTCCTCTGTATGACGATGGG     | 229/79.5                        | 86.90                    | 0.999                                           | MZ210065,<br>MZ210066             |
| <i>EF-1α</i>           | Translation elongation factor EF1A                 | ACAAGATGGACGCCACTACC/<br>AGAGGCTTGTCTGAGGGTCT       | 244/80.0                        | 94.20                    | 0.997                                           | MZ210067,<br>MZ210068             |
| <i>EIF4A1</i>          | Eukaryotic translation initiation factor 4A1       | GCAAGGTGGACTGGCTTACT/<br>TTTCAGGTTGGTTGGCAGA        | 216/79.5                        | 92.90                    | 0.999                                           | MZ210069                          |
| <i>PTB1</i>            | Polypyrimidine tract-binding protein 1             | GTCAAACCTATGCGGCTCCT/<br>AAGGCGAAGACCGAACCAAT       | 240/81.5                        | 92.50                    | 0.998                                           | MZ210070                          |
| <i>ACT7</i>            | Actin 7                                            | TTGCTGGCCGTGATCTAACT/<br>ACTTCTGGGCAACGGAATCT       | 241/79.0                        | 94.80                    | 1.000                                           | MZ210071                          |
| <i>ACT1</i>            | Actin 1                                            | ACCCAAAGGCTAACCCTGAA/<br>CGTACGGCCACTAGCATACA       | 113/76.5                        | 87.90                    | 0.998                                           | MZ210072                          |
| <i>GAPA</i>            | Glyceraldehyde-3-phosphate dehydrogenase A subunit | GCAGAAGAAGTGAACGCTGC/<br>GCTGTAACCCCACTCGTTGT       | 201/80.5                        | 106.50                   | 0.990                                           | MZ210073                          |
| <i>GAPB</i>            | Glyceraldehyde-3-phosphate dehydrogenase B subunit | TGTTCCACTCGTGTCTGTGG/<br>CTGTAGCCCCACTCGTTGTC       | 129/78.0                        | 103.80                   | 0.986                                           | MZ210074                          |
| <i>TUB1</i>            | Tubulin beta-1 chain                               | CCAAGGAGGTTGACGAGCAA/<br>GCTCACCCCTTCGGAACATCT      | 179/77.5                        | 90.40                    | 0.995                                           | MZ210076                          |
| <i>eIF2</i>            | Eukaryotic translation initiation factor 2         | TCCTTACACTCGAACCACGC/<br>ACACGGACCCATTCAACTCC       | 149/81.0                        | 101.90                   | 0.998                                           | OL456245                          |
| <i>ACO1</i>            | 1-aminocyclopropane-1-carboxylate oxidase 1        | CTTGGGGACCAACTTGAGGTTATT/<br>ATCGTTGCCTGGGTTGTAGAAG | 120/77.0                        | 95.80                    | 0.999                                           | OL456246                          |
| <i>PYL1</i>            | PYR1-like 1                                        | CAGTATAATTGGGGGCGAGCA/<br>ACGATTCCAGAACCACGCTC      | 104/81.0                        | 89.60                    | 0.988                                           | OL456247                          |
| <i>CSD2</i>            | Copper/zinc superoxide dismutase 2                 | TGTTGGTGATGACGGAAGTGT/<br>ATGCCACCTTCCCAAGAT        | 130/77.5                        | 97.70                    | 0.990                                           | OL456248,<br>OL456249             |

<sup>a</sup> Gene name based on similarity to *Arabidopsis* proteins. <sup>b</sup> Full-length cDNA accession number.
