# Supplementary material for: Identification of Reference Genes for RT-qPCR Analysis in Gleditsia microphylla under Abiotic Stress and Hormone Treatment
Source: MDPI journal article supplement (doi:10.3390/genes13071227), 2022-07-10
Supplement: s1 [file s1]

**Table S2.** Ct values of nine candidate reference genes in organs under different abiotic stresses or hormone treatments.

**Cold stress (4°C)**

|             | <i>TBP1</i> | <i>ACT7</i> | <i>CBP20</i> | <i>EF-1<math>\alpha</math></i> | <i>EIF4A1</i> | <i>GAPA</i> | <i>eIF2</i> | <i>GAPB</i> | <i>TUB1</i> |
|-------------|-------------|-------------|--------------|--------------------------------|---------------|-------------|-------------|-------------|-------------|
| <b>Root</b> | 32.06       | 31.29       | 32.86        | 32.23                          | 31.53         | 30.27       | 28.42       | 32.35       | 30.34       |
|             | 32.13       | 31.37       | 32.90        | 32.12                          | 31.39         | 30.22       | 28.71       | 32.79       | 30.54       |
|             | 31.45       | 28.59       | 32.91        | 29.80                          | 31.62         | 29.70       | 27.39       | 31.34       | 29.42       |
|             | 31.28       | 28.88       | 32.89        | 29.75                          | 31.65         | 29.95       | 27.56       | 31.29       | 30.01       |
|             | 31.80       | 28.68       | 32.91        | 29.30                          | 32.43         | 32.37       | 28.62       | 32.50       | 30.12       |
|             | 32.08       | 28.73       | 32.88        | 29.17                          | 32.25         | 32.53       | 28.57       | 32.92       | 30.32       |
| <b>Stem</b> | 29.18       | 28.17       | 30.84        | 29.33                          | 29.50         | 24.21       | 24.62       | 26.95       | 28.91       |
|             | 29.15       | 27.85       | 30.93        | 29.43                          | 29.50         | 24.10       | 24.73       | 27.00       | 29.01       |
|             | 29.52       | 27.26       | 30.96        | 29.80                          | 29.94         | 24.71       | 25.10       | 26.88       | 29.17       |
|             | 29.57       | 27.32       | 30.95        | 29.90                          | 29.83         | 24.76       | 25.06       | 26.86       | 29.32       |
|             | 29.56       | 26.75       | 30.94        | 29.50                          | 29.80         | 24.28       | 24.85       | 26.40       | 28.45       |
|             | 29.06       | 26.91       | 30.94        | 29.50                          | 29.63         | 24.33       | 24.91       | 26.55       | 28.93       |
| <b>Leaf</b> | 28.16       | 28.46       | 29.89        | 30.94                          | 30.12         | 22.58       | 24.40       | 25.50       | 29.41       |
|             | 28.10       | 28.98       | 29.80        | 30.84                          | 30.24         | 22.28       | 24.48       | 25.41       | 29.82       |
|             | 29.32       | 28.22       | 30.27        | 31.20                          | 30.58         | 22.62       | 25.04       | 25.40       | 29.90       |
|             | 29.40       | 28.21       | 30.36        | 31.28                          | 30.70         | 22.61       | 25.06       | 25.37       | 30.36       |
|             | 28.18       | 25.14       | 30.57        | 27.60                          | 28.30         | 22.18       | 24.12       | 23.76       | 28.07       |
|             | 28.22       | 25.22       | 30.88        | 27.53                          | 28.39         | 22.20       | 23.84       | 23.89       | 28.54       |

# Heat stress (42°C)

|             | <i>TBP1</i> | <i>ACT7</i> | <i>CBP20</i> | <i>EF-1<math>\alpha</math></i> | <i>EIF4A1</i> | <i>GAPA</i> | <i>eIF2</i> | <i>GAPB</i> | <i>TUB1</i> |
|-------------|-------------|-------------|--------------|--------------------------------|---------------|-------------|-------------|-------------|-------------|
| <b>Root</b> | 31.76       | 32.40       | 31.94        | 32.22                          | 31.11         | 30.67       | 30.60       | 32.05       | 32.22       |
|             | 31.66       | 32.36       | 31.67        | 31.82                          | 31.25         | 30.60       | 30.53       | 31.96       | 32.33       |
|             | 31.02       | 31.09       | 30.91        | 31.83                          | 30.57         | 30.03       | 29.87       | 31.43       | 30.83       |
|             | 31.03       | 30.89       | 31.00        | 31.67                          | 30.80         | 29.86       | 30.01       | 31.34       | 30.91       |
|             | 31.47       | 28.58       | 32.64        | 29.16                          | 31.01         | 29.66       | 29.41       | 30.41       | 30.09       |
|             | 31.36       | 28.71       | 32.89        | 29.05                          | 30.79         | 29.73       | 29.40       | 30.44       | 30.50       |
| <b>Stem</b> | 30.12       | 30.25       | 30.14        | 30.16                          | 29.18         | 24.07       | 27.41       | 27.44       | 28.53       |
|             | 29.65       | 30.20       | 30.10        | 30.04                          | 29.09         | 24.04       | 27.28       | 27.39       | 28.72       |
|             | 29.53       | 28.85       | 29.70        | 29.33                          | 29.25         | 23.86       | 26.85       | 26.25       | 29.18       |
|             | 29.38       | 28.61       | 29.65        | 29.28                          | 29.22         | 23.86       | 26.93       | 26.15       | 29.28       |
|             | 29.88       | 27.90       | 30.19        | 28.21                          | 29.66         | 24.14       | 26.97       | 26.25       | 28.76       |
|             | 29.55       | 28.11       | 30.43        | 28.13                          | 29.57         | 24.33       | 26.97       | 26.27       | 29.14       |
| <b>Leaf</b> | 28.26       | 29.91       | 28.83        | 29.08                          | 29.75         | 22.51       | 26.01       | 25.17       | 30.12       |
|             | 28.22       | 29.94       | 28.80        | 30.58                          | 29.86         | 22.55       | 26.03       | 25.19       | 30.35       |
|             | 29.13       | 29.47       | 30.46        | 30.26                          | 31.13         | 22.61       | 27.29       | 25.04       | 30.54       |
|             | 29.09       | 29.30       | 30.56        | 30.35                          | 31.09         | 22.64       | 27.19       | 24.78       | 30.66       |
|             | 28.69       | 27.74       | 30.29        | 27.66                          | 29.60         | 22.94       | 26.39       | 24.40       | 29.44       |
|             | 28.48       | 27.54       | 30.30        | 27.71                          | 29.17         | 22.96       | 26.39       | 24.20       | 29.63       |

# Drought stress (PEG)

|      | <i>TBP1</i> | <i>ACT7</i> | <i>CBP20</i> | <i>EF-1<math>\alpha</math></i> | <i>EIF4A1</i> | <i>GAPA</i> | <i>eIF2</i> | <i>GAPB</i> | <i>TUB1</i> |
|------|-------------|-------------|--------------|--------------------------------|---------------|-------------|-------------|-------------|-------------|
| Root | 31.94       | 29.71       | 32.43        | 28.45                          | 31.51         | 30.83       | 32.25       | 32.26       | 31.25       |
|      | 31.53       | 29.80       | 31.69        | 27.24                          | 31.40         | 30.55       | 32.10       | 32.11       | 31.33       |
|      | 31.47       | 29.05       | 32.44        | 28.13                          | 31.21         | 30.11       | 31.46       | 31.72       | 30.26       |
|      | 30.73       | 28.96       | 32.39        | 28.16                          | 31.17         | 30.11       | 31.45       | 31.89       | 30.33       |
|      | 31.46       | 28.79       | 32.24        | 27.38                          | 31.78         | 31.23       | 32.21       | 31.95       | 32.17       |
|      | 31.33       | 29.06       | 32.35        | 27.20                          | 31.25         | 31.36       | 31.94       | 31.95       | 32.34       |
| Stem | 30.74       | 29.04       | 32.25        | 28.71                          | 30.80         | 26.22       | 28.12       | 27.93       | 29.69       |
|      | 30.61       | 29.01       | 32.29        | 28.54                          | 30.71         | 26.16       | 28.09       | 28.07       | 29.95       |
|      | 30.19       | 28.15       | 31.09        | 29.06                          | 29.47         | 24.75       | 26.80       | 26.47       | 28.93       |
|      | 29.99       | 28.20       | 30.54        | 28.83                          | 29.58         | 24.81       | 26.60       | 26.40       | 29.19       |
|      | 29.25       | 27.11       | 28.08        | 28.61                          | 28.09         | 21.84       | 25.60       | 24.50       | 26.23       |
|      | 29.11       | 27.48       | 28.70        | 29.24                          | 27.92         | 22.66       | 25.58       | 24.94       | 26.82       |
| Leaf | 29.22       | 30.00       | 29.82        | 30.10                          | 30.40         | 23.35       | 26.37       | 25.77       | 30.19       |
|      | 29.30       | 29.71       | 29.44        | 30.19                          | 30.44         | 23.40       | 26.42       | 25.70       | 30.30       |
|      | 29.49       | 27.58       | 30.17        | 27.60                          | 29.68         | 23.98       | 26.44       | 25.41       | 29.38       |
|      | 29.41       | 27.63       | 30.39        | 27.54                          | 30.05         | 23.99       | 26.37       | 25.37       | 29.99       |
|      | 29.16       | 27.24       | 30.82        | 27.36                          | 29.96         | 23.42       | 26.29       | 25.00       | 29.73       |
|      | 29.34       | 26.93       | 30.53        | 27.43                          | 29.67         | 23.46       | 26.68       | 25.02       | 29.90       |

# Heavy metal stress (CuSO<sub>4</sub>)

|             | <i>TBP1</i> | <i>ACT7</i> | <i>CBP20</i> | <i>EF-1α</i> | <i>EIF4A1</i> | <i>GAPA</i> | <i>eIF2</i> | <i>GAPB</i> | <i>TUB1</i> |
|-------------|-------------|-------------|--------------|--------------|---------------|-------------|-------------|-------------|-------------|
| <b>Root</b> | 31.89       | 32.96       | 30.23        | 32.26        | 31.19         | 30.90       | 30.73       | 31.54       | 32.86       |
|             | 32.14       | 32.90       | 30.34        | 32.23        | 31.50         | 31.70       | 30.82       | 31.37       | 32.70       |
|             | 32.06       | 32.72       | 30.29        | 32.37        | 31.28         | 31.85       | 31.12       | 31.35       | 32.91       |
|             | 32.70       | 32.06       | 32.58        | 32.95        | 32.08         | 31.01       | 31.56       | 31.94       | 32.05       |
|             | 32.69       | 32.17       | 32.64        | 32.65        | 32.37         | 30.71       | 31.47       | 31.90       | 31.88       |
|             | 32.50       | 32.00       | 32.47        | 32.05        | 32.05         | 31.05       | 31.91       | 31.46       | 31.80       |
|             | 32.65       | 32.10       | 32.31        | 32.56        | 32.79         | 32.97       | 31.85       | 31.24       | 32.55       |
|             | 32.43       | 32.08       | 31.57        | 32.59        | 32.56         | 32.83       | 31.95       | 32.08       | 32.66       |
|             | 33.00       | 32.22       | 32.48        | 32.49        | 32.84         | 32.44       | 31.54       | 32.25       | 32.56       |
| <b>Stem</b> | 30.55       | 30.40       | 30.46        | 31.36        | 30.45         | 24.27       | 26.78       | 27.88       | 30.55       |
|             | 30.40       | 30.26       | 30.44        | 31.32        | 30.17         | 24.21       | 26.68       | 27.68       | 30.62       |
|             | 30.58       | 30.58       | 30.50        | 31.42        | 30.62         | 24.26       | 26.77       | 27.74       | 30.85       |
|             | 30.55       | 28.69       | 30.99        | 30.33        | 30.61         | 24.36       | 27.10       | 27.71       | 30.22       |
|             | 30.55       | 28.73       | 31.20        | 30.43        | 31.17         | 24.43       | 27.14       | 27.78       | 30.29       |
|             | 30.55       | 28.71       | 31.08        | 30.38        | 30.98         | 24.38       | 27.06       | 27.86       | 30.30       |
|             | 31.29       | 29.28       | 31.88        | 30.46        | 30.61         | 24.87       | 27.06       | 27.70       | 31.54       |
|             | 31.45       | 29.32       | 32.04        | 30.63        | 30.70         | 24.93       | 27.10       | 27.76       | 31.58       |
|             | 31.61       | 29.57       | 32.35        | 30.67        | 30.73         | 24.69       | 27.10       | 27.88       | 31.76       |
| <b>Leaf</b> | 29.82       | 30.03       | 30.38        | 30.77        | 29.72         | 23.11       | 25.63       | 26.90       | 30.42       |
|             | 29.64       | 29.75       | 30.07        | 30.60        | 29.67         | 23.51       | 25.65       | 26.64       | 31.46       |
|             | 29.70       | 30.00       | 30.14        | 30.68        | 29.71         | 23.28       | 25.68       | 27.04       | 31.49       |
|             | 30.39       | 29.65       | 31.52        | 31.55        | 32.51         | 22.27       | 27.32       | 26.34       | 32.54       |
|             | 30.16       | 29.62       | 31.45        | 31.44        | 32.41         | 22.32       | 27.37       | 26.41       | 32.66       |
|             | 30.29       | 29.62       | 31.51        | 31.48        | 32.44         | 22.31       | 27.54       | 26.36       | 32.81       |
|             | 30.45       | 30.52       | 31.73        | 30.70        | 30.04         | 24.33       | 27.34       | 27.31       | 31.61       |
|             | 32.04       | 30.83       | 32.12        | 30.88        | 30.09         | 24.53       | 27.34       | 27.21       | 31.68       |
|             | 31.29       | 30.54       | 31.81        | 30.81        | 30.08         | 24.22       | 27.40       | 27.33       | 31.78       |

Salinity stress (NaCl)

|      | <i>TBP1</i> | <i>ACT7</i> | <i>CBP20</i> | <i>EF-1<math>\alpha</math></i> | <i>EIF4A1</i> | <i>GAPA</i> | <i>eIF2</i> | <i>GAPB</i> | <i>TUB1</i> |
|------|-------------|-------------|--------------|--------------------------------|---------------|-------------|-------------|-------------|-------------|
| Root | 32.32       | 32.84       | 30.51        | 31.40                          | 32.32         | 30.18       | 30.55       | 32.85       | 32.78       |
|      | 31.96       | 32.07       | 30.48        | 31.34                          | 32.27         | 29.82       | 30.48       | 32.87       | 32.12       |
|      | 31.96       | 32.25       | 30.33        | 31.57                          | 32.11         | 29.66       | 30.44       | 32.92       | 32.32       |
|      | 32.86       | 32.93       | 32.33        | 30.80                          | 32.70         | 30.34       | 31.34       | 32.76       | 32.51       |
|      | 32.67       | 32.76       | 32.21        | 31.41                          | 32.58         | 29.75       | 31.67       | 32.65       | 32.38       |
|      | 33.00       | 32.83       | 32.38        | 31.25                          | 32.95         | 30.18       | 31.33       | 32.70       | 32.31       |
|      | 31.27       | 28.29       | 31.81        | 28.74                          | 31.14         | 29.03       | 30.04       | 31.00       | 31.24       |
|      | 31.50       | 28.60       | 32.34        | 28.78                          | 31.49         | 29.53       | 29.72       | 31.18       | 31.69       |
|      | 32.61       | 28.62       | 32.45        | 29.00                          | 31.56         | 29.70       | 29.85       | 31.37       | 31.95       |
| Stem | 30.35       | 29.99       | 30.14        | 30.98                          | 30.23         | 24.71       | 27.50       | 28.16       | 29.10       |
|      | 30.14       | 29.91       | 30.06        | 30.71                          | 30.19         | 24.62       | 27.43       | 28.13       | 29.23       |
|      | 30.61       | 30.04       | 30.15        | 31.03                          | 30.38         | 24.94       | 27.58       | 28.31       | 29.29       |
|      | 31.23       | 30.33       | 31.69        | 32.46                          | 32.25         | 24.61       | 29.06       | 28.46       | 30.43       |
|      | 31.51       | 30.34       | 31.71        | 32.53                          | 32.79         | 24.63       | 28.97       | 28.45       | 30.50       |
|      | 31.19       | 30.28       | 31.63        | 32.05                          | 32.16         | 24.70       | 29.06       | 28.56       | 30.52       |
|      | 30.69       | 28.61       | 31.18        | 30.29                          | 30.11         | 24.43       | 27.10       | 27.23       | 30.05       |
|      | 30.65       | 28.34       | 30.61        | 30.15                          | 29.98         | 24.21       | 27.10       | 27.27       | 30.33       |
|      | 30.81       | 28.68       | 31.33        | 30.32                          | 30.20         | 24.53       | 27.18       | 27.15       | 30.43       |
| Leaf | 30.17       | 31.97       | 30.15        | 31.38                          | 31.76         | 22.59       | 27.59       | 27.05       | 32.01       |
|      | 29.94       | 31.71       | 29.58        | 31.48                          | 31.58         | 21.96       | 27.38       | 26.94       | 32.30       |
|      | 30.08       | 31.86       | 29.76        | 31.25                          | 31.72         | 22.57       | 27.34       | 27.12       | 32.36       |
|      | 30.30       | 30.36       | 29.93        | 32.83                          | 31.62         | 22.80       | 27.47       | 26.41       | 32.42       |
|      | 30.77       | 30.59       | 30.07        | 32.93                          | 31.78         | 23.08       | 27.55       | 26.50       | 32.45       |
|      | 30.66       | 30.50       | 29.94        | 32.88                          | 31.74         | 22.96       | 27.55       | 26.44       | 32.59       |
|      | 30.39       | 29.84       | 31.02        | 30.47                          | 29.64         | 23.44       | 27.39       | 26.87       | 30.35       |
|      | 30.40       | 29.87       | 31.03        | 30.59                          | 29.97         | 23.59       | 27.43       | 26.70       | 30.74       |
|      | 30.38       | 28.60       | 30.71        | 29.89                          | 28.96         | 23.18       | 27.34       | 26.73       | 31.22       |

ABA treatment

|      | <i>TBP1</i> | <i>ACT7</i> | <i>CBP20</i> | <i>EF-1<math>\alpha</math></i> | <i>EIF4A1</i> | <i>GAPA</i> | <i>eIF2</i> | <i>GAPB</i> | <i>TUB1</i> |
|------|-------------|-------------|--------------|--------------------------------|---------------|-------------|-------------|-------------|-------------|
| Root | 32.40       | 31.39       | 31.60        | 32.35                          | 31.23         | 30.15       | 31.22       | 32.50       | 30.44       |
|      | 32.18       | 31.36       | 31.61        | 31.98                          | 31.24         | 29.91       | 31.19       | 32.59       | 30.65       |
|      | 32.32       | 31.22       | 31.73        | 32.40                          | 31.45         | 29.86       | 31.23       | 32.41       | 30.87       |
|      | 32.06       | 30.52       | 31.55        | 31.73                          | 31.01         | 29.11       | 30.75       | 31.13       | 30.58       |
|      | 31.83       | 30.25       | 31.34        | 31.43                          | 31.00         | 28.76       | 30.40       | 31.27       | 30.92       |
|      | 32.26       | 30.62       | 31.55        | 31.61                          | 31.03         | 29.16       | 30.59       | 31.43       | 31.00       |
|      | 32.28       | 31.51       | 31.60        | 32.34                          | 31.41         | 31.78       | 32.94       | 32.83       | 30.30       |
|      | 32.09       | 31.57       | 31.53        | 32.39                          | 31.89         | 31.65       | 32.72       | 32.84       | 30.38       |
|      | 32.68       | 31.44       | 31.37        | 32.33                          | 31.82         | 31.20       | 32.78       | 32.80       | 30.40       |
| Stem | 30.82       | 30.02       | 30.68        | 30.83                          | 30.05         | 25.10       | 27.54       | 27.83       | 29.95       |
|      | 30.67       | 29.91       | 30.69        | 30.72                          | 30.00         | 25.01       | 27.39       | 27.79       | 30.02       |
|      | 30.69       | 30.08       | 30.82        | 31.36                          | 30.16         | 25.12       | 27.64       | 27.90       | 30.05       |
|      | 31.67       | 29.86       | 31.34        | 30.91                          | 30.35         | 26.01       | 28.10       | 28.69       | 29.01       |
|      | 31.54       | 29.72       | 31.22        | 30.48                          | 30.26         | 25.95       | 28.02       | 28.59       | 29.05       |
|      | 31.39       | 29.87       | 31.38        | 30.85                          | 30.16         | 25.88       | 28.10       | 28.62       | 29.26       |
|      | 30.92       | 31.10       | 28.57        | 29.46                          | 27.84         | 22.68       | 27.39       | 27.39       | 28.29       |
|      | 30.59       | 30.80       | 28.40        | 29.38                          | 27.90         | 22.32       | 27.45       | 27.32       | 28.36       |
|      | 30.95       | 31.05       | 28.48        | 29.29                          | 27.95         | 22.58       | 27.43       | 27.40       | 28.38       |
| Leaf | 30.30       | 32.92       | 28.37        | 29.86                          | 30.47         | 21.08       | 27.62       | 26.19       | 31.38       |
|      | 30.58       | 32.33       | 28.37        | 29.96                          | 30.27         | 21.50       | 27.70       | 26.34       | 31.43       |
|      | 30.65       | 32.57       | 28.38        | 29.01                          | 30.23         | 21.72       | 27.53       | 26.29       | 31.60       |
|      | 30.94       | 30.00       | 30.64        | 29.74                          | 29.00         | 23.18       | 27.14       | 26.02       | 29.96       |
|      | 30.68       | 30.07       | 30.74        | 29.73                          | 29.03         | 23.17       | 26.90       | 26.00       | 29.98       |
|      | 30.81       | 30.05       | 30.72        | 29.63                          | 29.04         | 23.32       | 27.15       | 26.19       | 30.05       |
|      | 31.97       | 30.09       | 31.78        | 29.90                          | 28.83         | 24.07       | 27.90       | 26.18       | 29.89       |
|      | 32.23       | 30.35       | 31.64        | 29.82                          | 28.90         | 24.26       | 28.35       | 26.20       | 29.91       |
|      | 32.33       | 30.32       | 31.08        | 29.70                          | 28.56         | 27.76       | 28.01       | 26.26       | 29.95       |

# MeJA treatment

|      | <i>TBP1</i> | <i>ACT7</i> | <i>CBP20</i> | <i>EF-1<math>\alpha</math></i> | <i>EIF4A1</i> | <i>GAPA</i> | <i>eIF2</i> | <i>GAPB</i> | <i>TUB1</i> |
|------|-------------|-------------|--------------|--------------------------------|---------------|-------------|-------------|-------------|-------------|
| Root | 31.32       | 30.53       | 30.64        | 30.89                          | 31.14         | 28.30       | 29.86       | 31.48       | 30.78       |
|      | 31.27       | 30.93       | 31.06        | 30.55                          | 31.10         | 28.90       | 30.16       | 31.58       | 31.07       |
|      | 31.72       | 30.98       | 31.15        | 31.14                          | 31.73         | 28.88       | 30.00       | 31.45       | 31.16       |
|      | 32.82       | 30.00       | 32.91        | 30.39                          | 31.65         | 29.87       | 30.99       | 31.92       | 31.13       |
|      | 32.72       | 30.10       | 32.71        | 30.44                          | 31.15         | 29.81       | 30.86       | 32.03       | 31.14       |
|      | 32.85       | 30.15       | 32.37        | 29.85                          | 30.84         | 29.95       | 30.94       | 31.87       | 31.31       |
|      | 32.66       | 29.15       | 31.23        | 28.96                          | 30.85         | 30.63       | 30.56       | 30.51       | 30.97       |
|      | 32.65       | 30.53       | 31.38        | 30.98                          | 32.87         | 30.22       | 31.95       | 32.20       | 31.73       |
|      | 32.64       | 30.23       | 31.24        | 30.89                          | 32.65         | 30.44       | 31.60       | 32.37       | 32.08       |
| Stem | 29.80       | 28.66       | 29.23        | 28.07                          | 29.25         | 24.49       | 27.00       | 26.75       | 28.89       |
|      | 29.96       | 28.84       | 30.22        | 29.04                          | 29.57         | 24.57       | 27.30       | 27.34       | 29.23       |
|      | 29.84       | 28.90       | 30.19        | 29.05                          | 29.63         | 24.40       | 27.28       | 27.31       | 29.23       |
|      | 30.92       | 28.91       | 30.46        | 30.11                          | 29.49         | 24.59       | 27.41       | 27.53       | 29.24       |
|      | 31.16       | 28.98       | 30.58        | 30.23                          | 29.78         | 24.67       | 27.46       | 27.61       | 29.29       |
|      | 31.17       | 28.64       | 30.34        | 29.72                          | 29.58         | 24.71       | 27.45       | 27.50       | 29.38       |
|      | 31.28       | 28.35       | 31.64        | 29.44                          | 31.20         | 25.50       | 27.87       | 28.08       | 29.78       |
|      | 31.33       | 28.25       | 31.29        | 29.36                          | 30.68         | 25.86       | 27.83       | 28.11       | 29.99       |
|      | 31.61       | 28.31       | 31.70        | 29.38                          | 30.88         | 25.88       | 27.80       | 28.11       | 30.00       |
| Leaf | 29.60       | 29.28       | 28.78        | 29.62                          | 29.94         | 21.86       | 26.59       | 25.63       | 30.14       |
|      | 29.49       | 29.20       | 28.75        | 29.62                          | 29.86         | 21.97       | 26.56       | 25.61       | 30.20       |
|      | 29.99       | 29.36       | 28.79        | 29.76                          | 30.06         | 22.16       | 26.58       | 25.67       | 30.37       |
|      | 30.61       | 28.61       | 30.42        | 29.02                          | 29.98         | 23.70       | 26.57       | 26.23       | 30.17       |
|      | 30.32       | 28.44       | 30.44        | 29.11                          | 30.08         | 23.80       | 26.40       | 26.14       | 30.31       |
|      | 30.24       | 28.55       | 30.39        | 29.06                          | 29.92         | 23.80       | 26.36       | 26.15       | 30.39       |
|      | 30.53       | 28.38       | 30.32        | 28.53                          | 30.24         | 23.61       | 26.97       | 26.34       | 30.42       |
|      | 30.50       | 28.36       | 30.23        | 28.17                          | 30.39         | 23.17       | 26.98       | 25.69       | 30.51       |
|      | 30.48       | 28.24       | 29.98        | 28.22                          | 30.57         | 23.65       | 26.93       | 25.97       | 30.55       |

SA treatment

|      | <i>TBP1</i> | <i>ACT7</i> | <i>CBP20</i> | <i>EF-1<math>\alpha</math></i> | <i>EIF4A1</i> | <i>GAPA</i> | <i>eIF2</i> | <i>GAPB</i> | <i>TUB1</i> |
|------|-------------|-------------|--------------|--------------------------------|---------------|-------------|-------------|-------------|-------------|
| Root | 31.32       | 31.33       | 29.95        | 32.84                          | 30.57         | 28.47       | 30.64       | 31.46       | 29.83       |
|      | 31.07       | 31.22       | 29.96        | 32.75                          | 30.56         | 28.17       | 30.53       | 31.51       | 29.87       |
|      | 31.30       | 31.30       | 29.93        | 32.77                          | 30.37         | 28.65       | 30.66       | 31.66       | 29.99       |
|      | 32.58       | 30.15       | 32.46        | 30.27                          | 32.38         | 31.55       | 32.02       | 32.34       | 31.56       |
|      | 32.87       | 30.07       | 32.59        | 30.25                          | 32.33         | 31.76       | 32.19       | 32.68       | 31.68       |
|      | 32.92       | 30.22       | 32.84        | 30.80                          | 32.78         | 32.09       | 32.13       | 32.45       | 31.85       |
|      | 31.78       | 31.32       | 32.55        | 32.78                          | 31.63         | 30.57       | 31.72       | 32.15       | 31.80       |
|      | 31.81       | 31.37       | 32.68        | 32.69                          | 32.20         | 30.98       | 32.08       | 32.28       | 31.96       |
|      | 31.93       | 31.72       | 32.58        | 32.58                          | 32.00         | 30.95       | 31.70       | 32.15       | 32.00       |
| Stem | 31.82       | 31.46       | 30.59        | 32.60                          | 31.26         | 25.13       | 27.67       | 28.43       | 30.70       |
|      | 31.79       | 31.68       | 30.54        | 32.71                          | 31.22         | 25.04       | 27.71       | 28.35       | 30.74       |
|      | 31.69       | 31.53       | 30.62        | 32.52                          | 31.40         | 25.13       | 27.80       | 28.38       | 30.81       |
|      | 31.68       | 29.41       | 30.85        | 30.68                          | 30.43         | 25.59       | 27.60       | 28.09       | 29.99       |
|      | 31.63       | 29.52       | 30.79        | 30.84                          | 30.43         | 25.48       | 27.65       | 28.07       | 30.11       |
|      | 31.70       | 29.29       | 30.90        | 30.78                          | 30.69         | 25.57       | 27.62       | 27.93       | 30.12       |
|      | 30.76       | 30.53       | 32.91        | 31.38                          | 32.79         | 28.14       | 30.80       | 30.88       | 31.61       |
|      | 31.04       | 30.61       | 32.85        | 31.39                          | 32.71         | 28.32       | 31.39       | 30.92       | 32.00       |
|      | 31.32       | 30.73       | 32.81        | 31.36                          | 32.96         | 27.70       | 31.02       | 31.05       | 32.05       |
| Leaf | 29.67       | 29.96       | 29.19        | 31.32                          | 30.63         | 22.45       | 27.18       | 25.72       | 30.60       |
|      | 29.26       | 29.81       | 29.06        | 31.35                          | 30.79         | 22.13       | 27.39       | 25.60       | 30.91       |
|      | 29.61       | 29.90       | 29.18        | 31.36                          | 30.75         | 22.44       | 27.26       | 25.75       | 30.93       |
|      | 30.42       | 29.72       | 29.95        | 29.66                          | 28.86         | 22.63       | 27.31       | 26.07       | 30.80       |
|      | 30.69       | 29.83       | 29.97        | 29.81                          | 28.95         | 22.79       | 27.49       | 26.02       | 30.98       |
|      | 30.60       | 29.75       | 29.90        | 29.52                          | 28.91         | 22.68       | 27.61       | 26.04       | 31.14       |
|      | 32.06       | 30.64       | 31.37        | 30.39                          | 30.29         | 24.21       | 28.11       | 27.01       | 29.45       |
|      | 31.90       | 30.63       | 31.44        | 30.45                          | 30.03         | 24.25       | 28.08       | 27.05       | 29.65       |
|      | 31.81       | 30.57       | 31.18        | 30.54                          | 30.06         | 24.29       | 28.07       | 27.09       | 29.77       |



# Tissues

|             | <i>TBP1</i> | <i>ACT7</i> | <i>CBP20</i> | <i>EF-1<math>\alpha</math></i> | <i>EIF4A1</i> | <i>GAPA</i> | <i>eIF2</i> | <i>GAPB</i> | <i>TUB1</i> |
|-------------|-------------|-------------|--------------|--------------------------------|---------------|-------------|-------------|-------------|-------------|
| <b>Root</b> | 32.69       | 29.23       | 30.72        | 30.56                          | 31.88         | 30.58       | 31.50       | 32.01       | 31.87       |
|             | 32.19       | 29.27       | 30.91        | 30.83                          | 31.91         | 30.95       | 31.92       | 32.10       | 32.48       |
|             | 32.50       | 29.49       | 30.46        | 30.31                          | 31.15         | 30.58       | 31.88       | 32.35       | 32.62       |
|             | 31.63       | 29.69       | 32.02        | 30.25                          | 31.97         | 30.03       | 31.02       | 32.23       | 31.88       |
|             | 30.93       | 28.90       | 31.72        | 30.10                          | 31.68         | 30.15       | 30.97       | 32.32       | 31.99       |
|             | 31.88       | 29.99       | 32.08        | 30.29                          | 32.10         | 29.99       | 31.29       | 32.27       | 32.04       |
|             | 31.67       | 28.42       | 31.30        | 29.03                          | 31.11         | 30.81       | 30.93       | 31.58       | 30.93       |
|             | 32.45       | 29.40       | 31.33        | 29.79                          | 32.17         | 30.61       | 31.66       | 32.72       | 31.70       |
|             | 32.66       | 29.46       | 31.22        | 30.05                          | 32.33         | 30.43       | 31.37       | 32.76       | 31.80       |
|             | 30.84       | 29.16       | 31.29        | 28.49                          | 29.18         | 29.89       | 31.93       | 32.26       | 29.64       |
|             | 30.95       | 29.19       | 31.21        | 28.72                          | 29.23         | 29.95       | 32.00       | 32.34       | 29.67       |
|             | 31.21       | 28.59       | 31.92        | 28.21                          | 29.77         | 29.44       | 31.33       | 31.85       | 29.05       |
|             | 30.58       | 28.51       | 32.44        | 28.18                          | 29.91         | 29.62       | 31.74       | 32.10       | 29.41       |
|             | 30.97       | 27.78       | 32.36        | 26.77                          | 30.54         | 32.04       | 31.46       | 32.59       | 29.62       |
|             | 30.93       | 27.86       | 32.37        | 26.58                          | 30.30         | 32.28       | 31.80       | 32.53       | 30.16       |
|             | 30.86       | 30.33       | 29.62        | 29.53                          | 30.63         | 30.80       | 31.56       | 32.35       | 30.03       |
|             | 30.61       | 30.22       | 30.35        | 29.18                          | 30.68         | 30.51       | 31.25       | 31.82       | 30.28       |
|             | 31.74       | 29.64       | 31.92        | 28.66                          | 31.71         | 31.06       | 27.62       | 32.43       | 31.46       |
|             | 31.56       | 29.42       | 32.16        | 28.26                          | 31.57         | 31.07       | 31.51       | 32.35       | 31.55       |
|             | 32.04       | 29.16       | 32.80        | 28.47                          | 32.00         | 31.37       | 32.13       | 32.23       | 31.28       |
|             | 31.11       | 27.93       | 32.37        | 27.60                          | 30.74         | 31.28       | 31.27       | 30.69       | 31.38       |
| <b>Stem</b> | 29.00       | 28.96       | 29.76        | 29.46                          | 29.30         | 23.57       | 27.37       | 26.68       | 30.13       |
|             | 30.10       | 30.18       | 30.66        | 30.42                          | 30.33         | 24.01       | 27.80       | 27.51       | 30.59       |
|             | 30.19       | 30.30       | 31.00        | 30.63                          | 30.52         | 23.63       | 27.85       | 27.52       | 30.89       |
|             | 30.65       | 29.47       | 30.70        | 30.72                          | 29.59         | 24.06       | 27.95       | 27.56       | 29.54       |
|             | 30.60       | 29.36       | 30.61        | 30.70                          | 29.52         | 24.15       | 28.06       | 27.58       | 29.65       |
|             | 30.06       | 29.31       | 30.18        | 30.53                          | 29.51         | 24.13       | 28.05       | 27.58       | 29.77       |

|      |       |       |       |       |       |       |       |       |       |
|------|-------|-------|-------|-------|-------|-------|-------|-------|-------|
| Stem | 31.77 | 29.05 | 32.10 | 30.25 | 31.18 | 26.16 | 29.38 | 28.80 | 30.51 |
|      | 31.83 | 29.41 | 32.73 | 30.25 | 31.30 | 26.19 | 29.53 | 28.83 | 30.52 |
|      | 32.06 | 29.49 | 32.94 | 30.27 | 31.33 | 25.97 | 29.28 | 29.00 | 30.68 |
|      | 29.37 | 28.39 | 30.51 | 28.89 | 29.69 | 23.42 | 27.28 | 25.92 | 28.68 |
|      | 29.33 | 28.36 | 30.63 | 28.79 | 29.53 | 23.49 | 27.34 | 25.84 | 28.79 |
|      | 29.82 | 28.10 | 30.32 | 29.66 | 28.61 | 23.36 | 27.38 | 25.35 | 29.01 |
|      | 29.78 | 28.12 | 30.36 | 29.66 | 28.58 | 23.34 | 27.20 | 25.05 | 29.01 |
|      | 30.17 | 28.16 | 31.34 | 30.01 | 29.64 | 23.94 | 27.71 | 26.21 | 28.10 |
|      | 30.15 | 28.04 | 31.51 | 29.91 | 29.66 | 24.15 | 27.70 | 26.25 | 28.63 |
|      | 30.30 | 29.43 | 31.05 | 29.64 | 29.85 | 24.19 | 27.01 | 26.13 | 29.66 |
|      | 30.91 | 30.09 | 31.09 | 30.41 | 30.38 | 24.85 | 27.24 | 26.88 | 30.06 |
|      | 30.33 | 28.97 | 30.25 | 30.27 | 29.70 | 24.39 | 27.67 | 27.06 | 28.64 |
|      | 30.48 | 29.16 | 30.25 | 30.20 | 29.62 | 24.45 | 27.62 | 27.05 | 28.70 |
|      | 30.80 | 29.03 | 30.74 | 31.06 | 29.95 | 24.59 | 27.93 | 27.48 | 27.69 |
|      | 30.67 | 28.99 | 30.93 | 31.10 | 29.84 | 24.51 | 27.91 | 27.60 | 27.71 |
| Leaf | 29.46 | 30.68 | 30.82 | 31.32 | 30.16 | 22.14 | 28.02 | 26.33 | 29.38 |
|      | 27.99 | 29.59 | 30.61 | 29.39 | 28.86 | 22.30 | 27.93 | 26.32 | 30.99 |
|      | 28.93 | 30.27 | 30.74 | 30.69 | 29.69 | 21.97 | 27.87 | 26.27 | 31.38 |
|      | 29.63 | 28.58 | 29.92 | 29.45 | 28.25 | 22.03 | 27.69 | 25.37 | 29.37 |
|      | 29.19 | 28.50 | 29.89 | 28.97 | 28.14 | 21.88 | 27.75 | 25.33 | 29.50 |
|      | 29.64 | 28.72 | 30.03 | 29.52 | 28.34 | 22.07 | 27.64 | 25.32 | 29.74 |
|      | 28.51 | 26.68 | 30.29 | 28.03 | 28.25 | 21.70 | 27.14 | 24.40 | 28.34 |
|      | 28.72 | 26.78 | 30.32 | 28.28 | 28.37 | 21.82 | 27.39 | 24.47 | 29.10 |
|      | 28.45 | 26.66 | 30.05 | 27.53 | 27.59 | 21.71 | 27.40 | 24.55 | 29.25 |
|      | 30.08 | 30.02 | 30.66 | 31.02 | 29.79 | 22.69 | 27.74 | 25.02 | 30.29 |
|      | 29.89 | 29.96 | 30.90 | 30.87 | 29.61 | 22.82 | 27.80 | 25.16 | 30.93 |
|      | 29.77 | 27.92 | 30.47 | 29.90 | 29.15 | 22.11 | 27.91 | 24.13 | 30.59 |
|      | 29.75 | 27.91 | 30.11 | 29.93 | 29.12 | 22.12 | 28.05 | 24.08 | 30.70 |
|      | 30.06 | 27.90 | 31.95 | 29.07 | 28.81 | 23.06 | 27.40 | 24.17 | 29.23 |
|      | 29.96 | 27.82 | 31.06 | 29.09 | 28.81 | 23.09 | 27.48 | 24.28 | 29.35 |

|        |       |       |       |       |       |       |       |       |       |
|--------|-------|-------|-------|-------|-------|-------|-------|-------|-------|
|        | 29.34 | 29.60 | 29.36 | 30.28 | 30.13 | 22.47 | 26.61 | 24.69 | 29.83 |
|        | 29.33 | 28.80 | 29.66 | 29.59 | 30.30 | 22.54 | 26.76 | 24.91 | 30.46 |
|        | 29.16 | 28.13 | 29.70 | 28.83 | 28.89 | 22.58 | 26.49 | 24.22 | 29.19 |
|        | 29.20 | 28.12 | 29.67 | 28.62 | 28.88 | 22.59 | 26.54 | 24.21 | 29.35 |
|        | 29.69 | 27.14 | 30.67 | 28.18 | 28.40 | 23.15 | 26.26 | 23.82 | 28.33 |
|        | 29.45 | 27.41 | 30.54 | 27.84 | 28.29 | 23.10 | 26.42 | 24.22 | 28.64 |
| Flower | 29.77 | 29.05 | 27.22 | 31.58 | 27.60 | 22.34 | 29.08 | 26.17 | 26.31 |
|        | 29.70 | 28.92 | 27.30 | 31.59 | 27.57 | 22.53 | 28.99 | 26.32 | 26.32 |
|        | 29.27 | 28.22 | 26.06 | 28.92 | 27.36 | 23.71 | 26.93 | 26.26 | 26.49 |
|        | 29.31 | 28.47 | 26.19 | 29.08 | 27.27 | 23.63 | 26.92 | 26.22 | 26.76 |
|        | 28.47 | 27.48 | 25.96 | 29.72 | 26.40 | 22.04 | 26.10 | 25.23 | 24.97 |
|        | 28.46 | 27.48 | 25.93 | 29.69 | 26.38 | 22.17 | 26.04 | 25.20 | 24.98 |
|        | 29.98 | 27.95 | 27.32 | 29.42 | 28.21 | 23.71 | 27.45 | 26.73 | 27.49 |
|        | 30.25 | 28.02 | 27.26 | 29.44 | 28.07 | 23.73 | 27.48 | 26.75 | 27.51 |
|        | 29.25 | 28.17 | 26.92 | 29.38 | 27.95 | 25.02 | 26.98 | 26.86 | 26.45 |
|        | 29.34 | 28.29 | 27.35 | 29.31 | 28.07 | 24.81 | 26.78 | 26.90 | 26.45 |
|        | 28.58 | 26.10 | 27.00 | 26.26 | 25.64 | 23.37 | 25.69 | 25.16 | 25.28 |
|        | 28.72 | 26.04 | 26.91 | 26.39 | 25.67 | 23.36 | 25.69 | 25.24 | 25.37 |
