# Supplementary material for: Identification of Reference Genes for RT-qPCR Analysis in Gleditsia microphylla under Abiotic Stress and Hormone Treatment
Source: MDPI journal article supplement (doi:10.3390/genes13071227), 2022-07-10
Supplement: s1 [file s1]

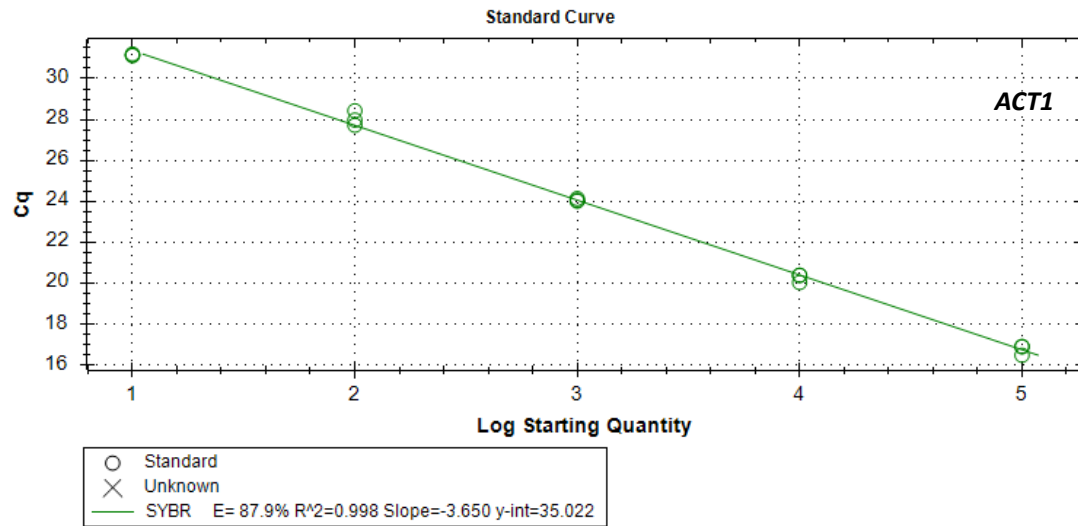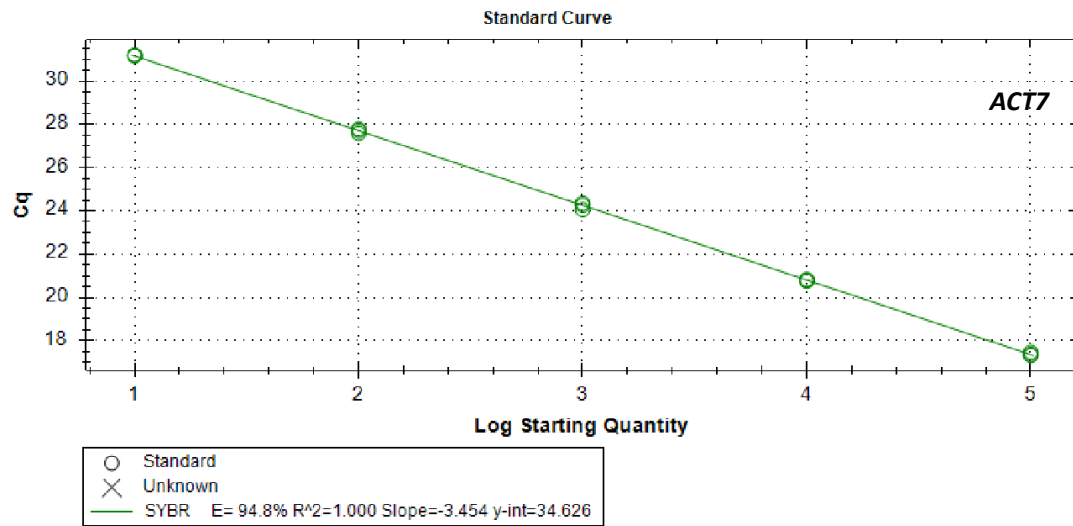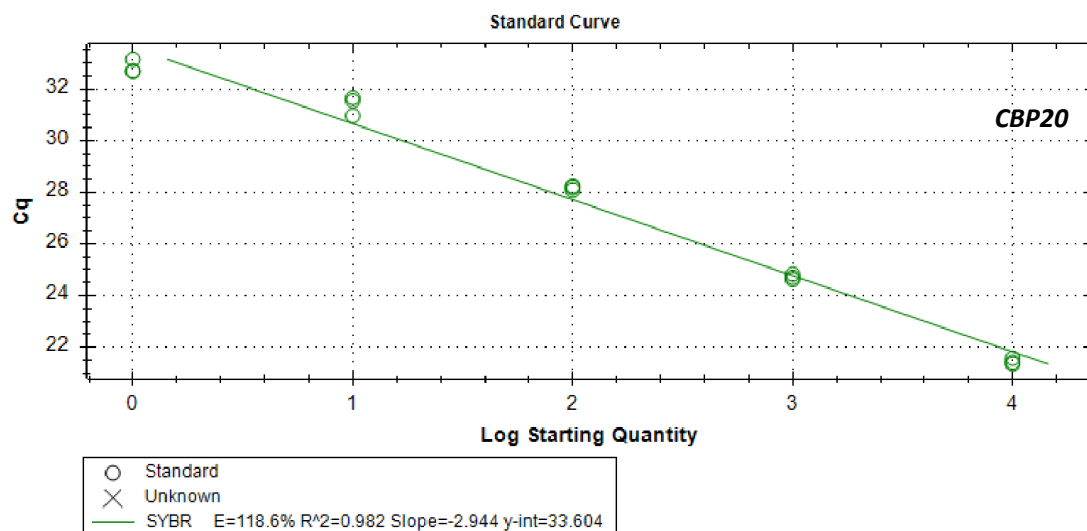

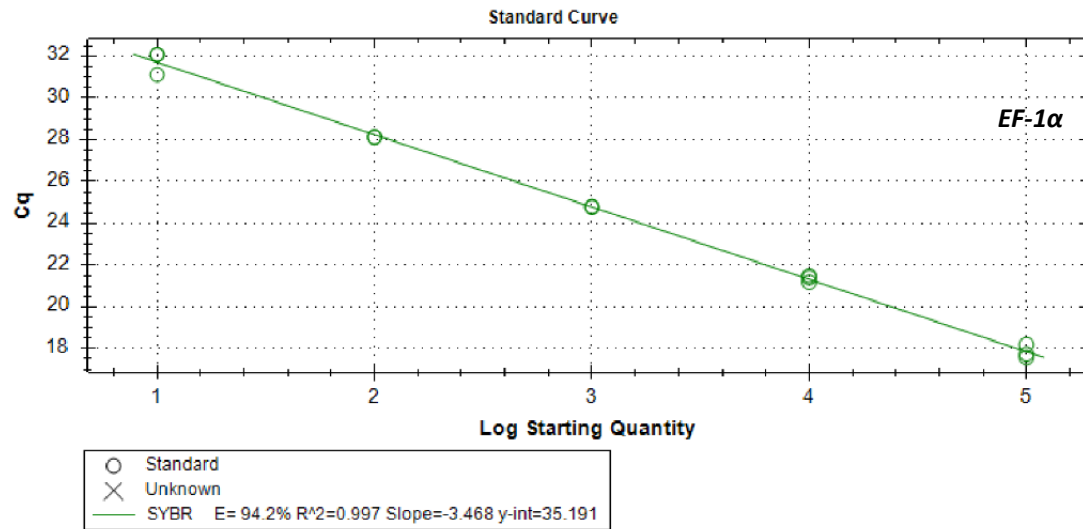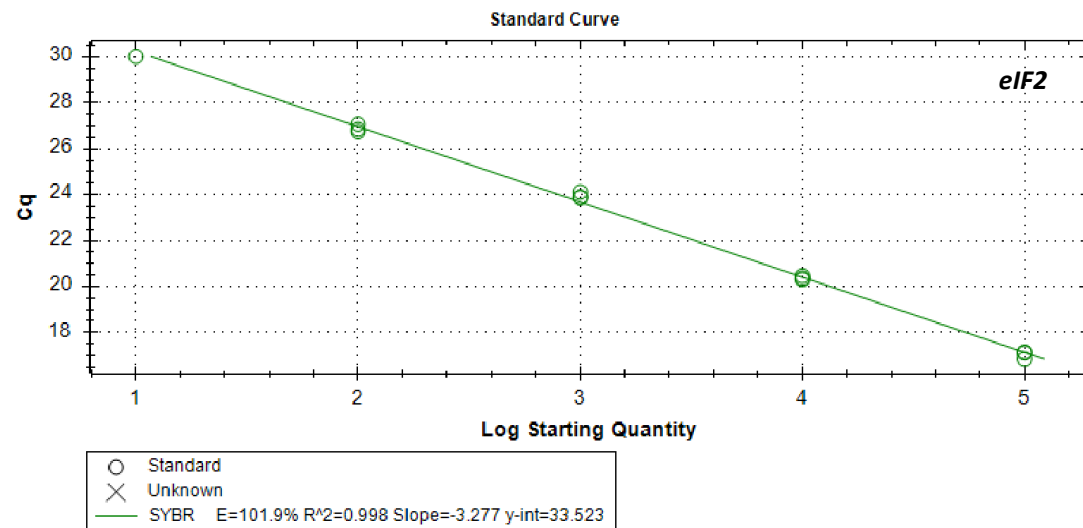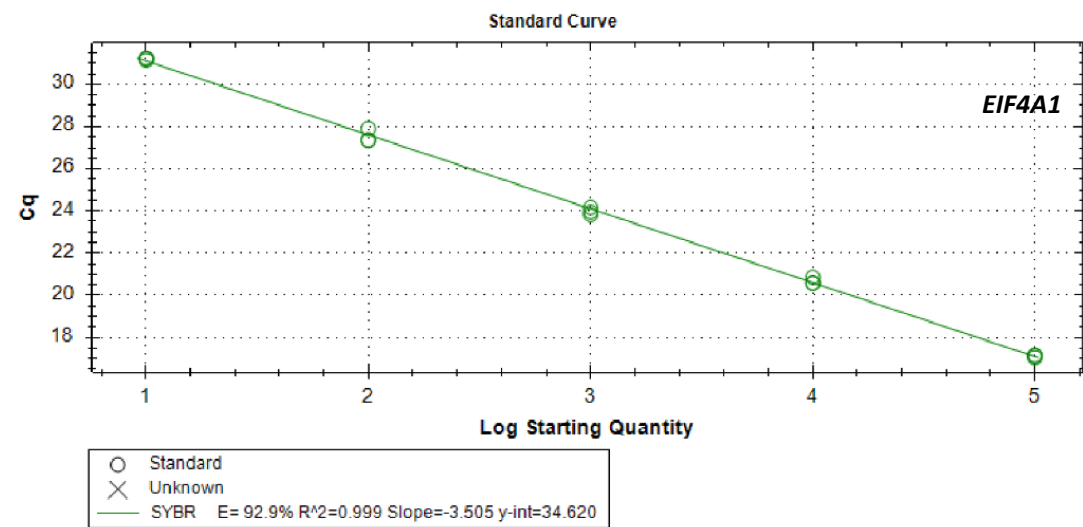

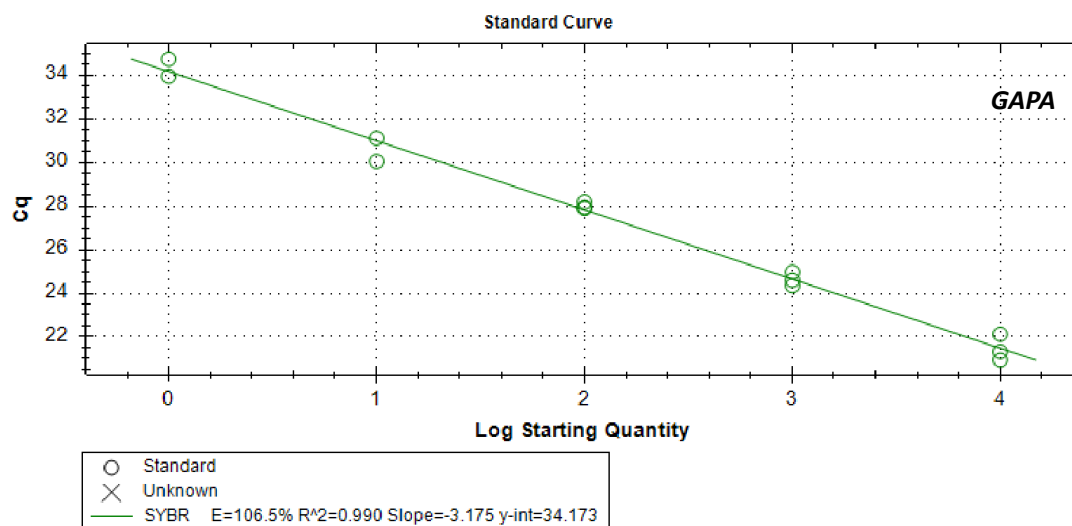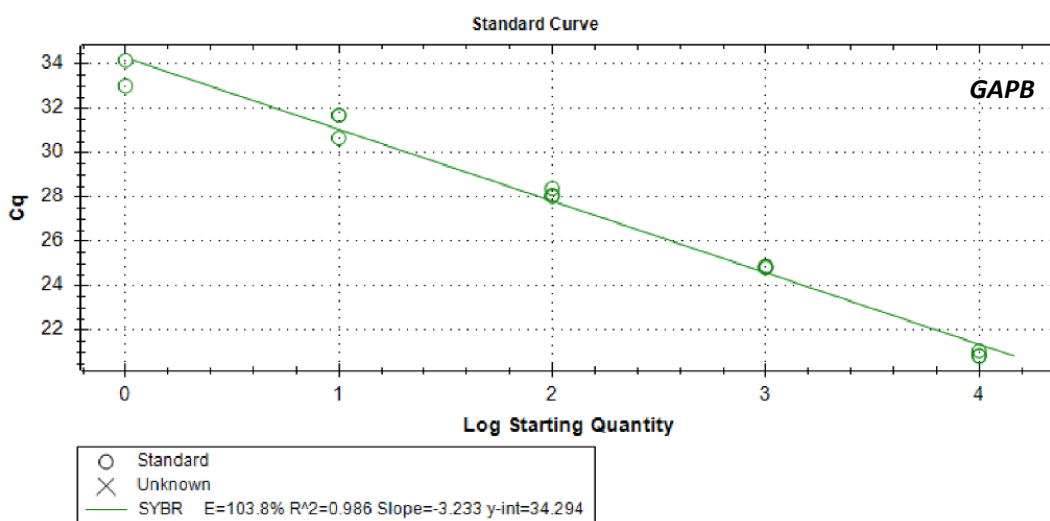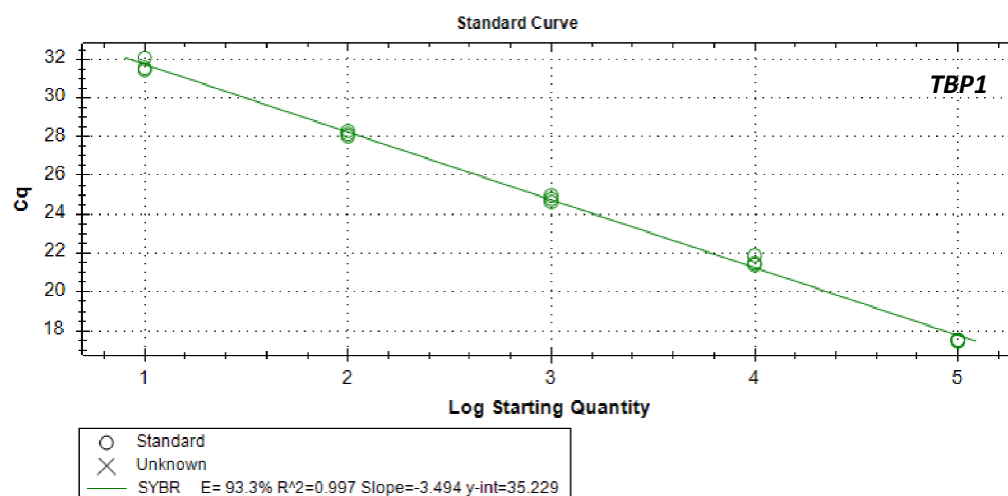

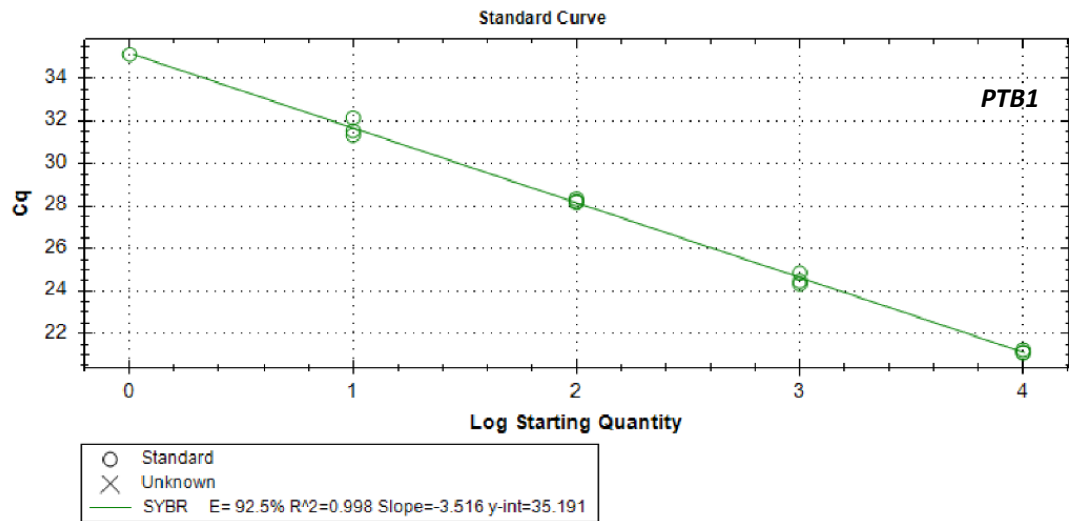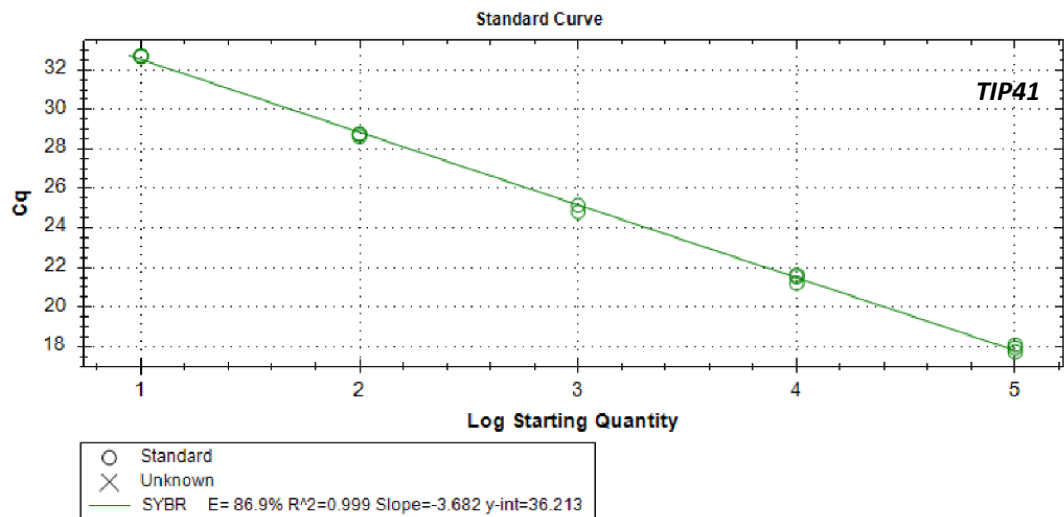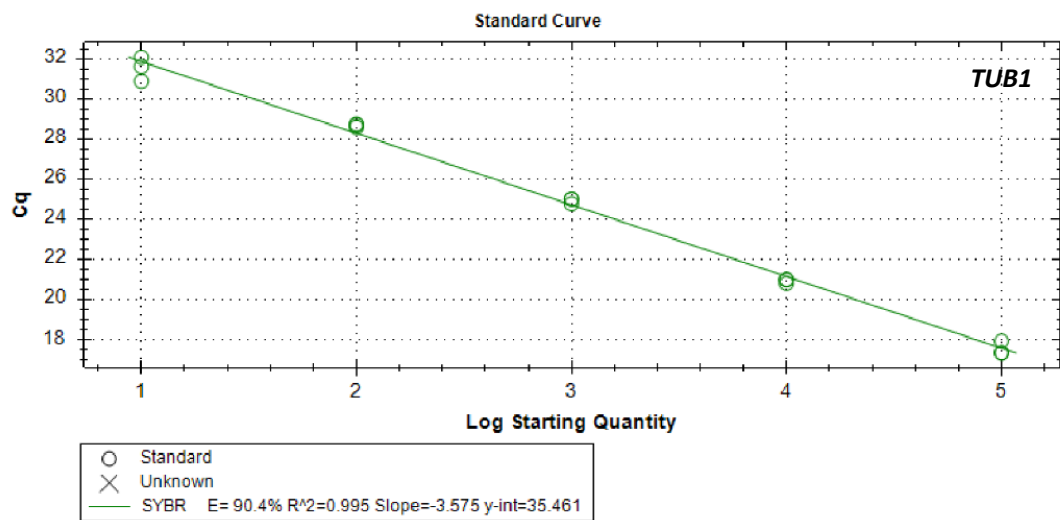

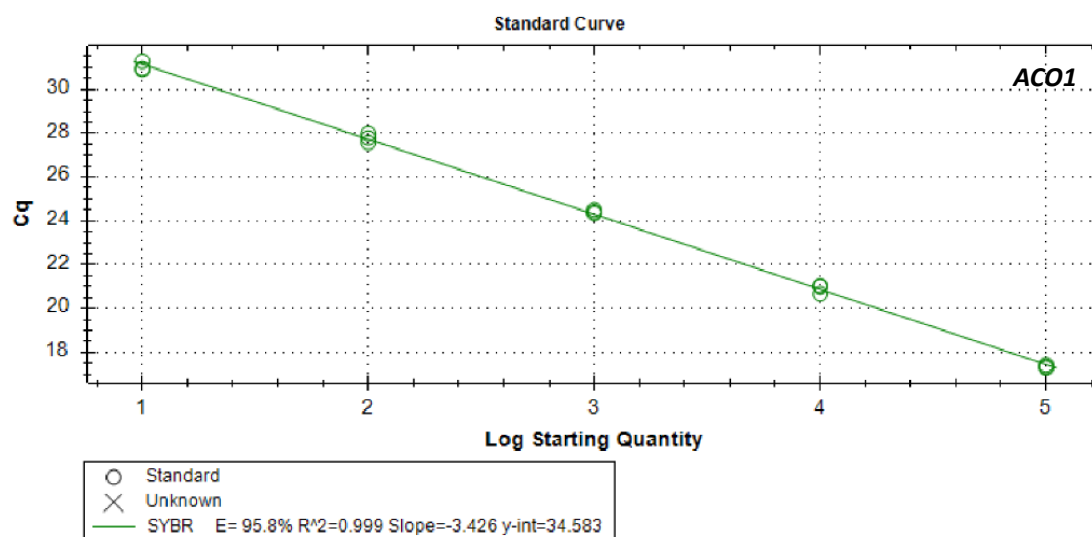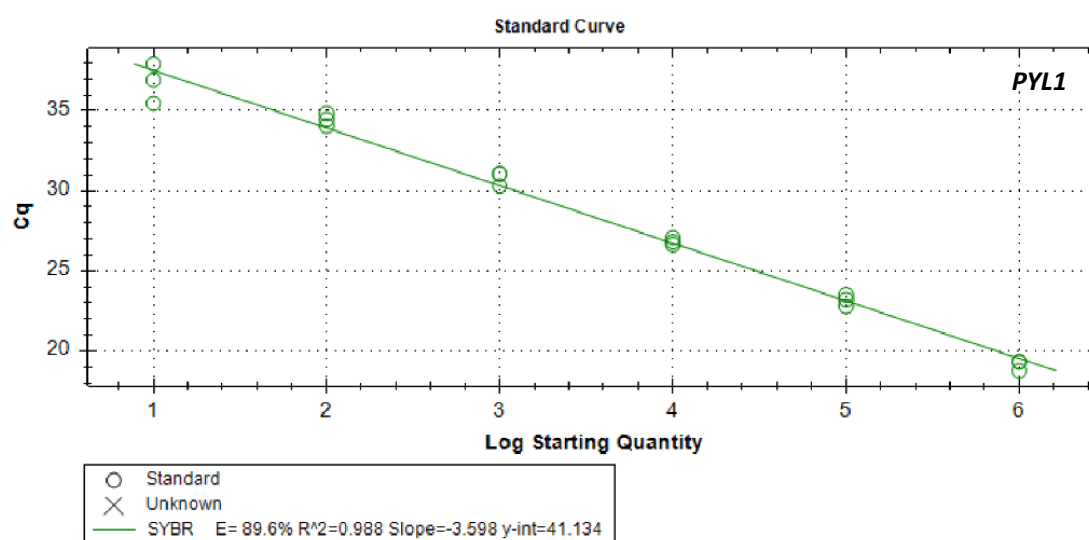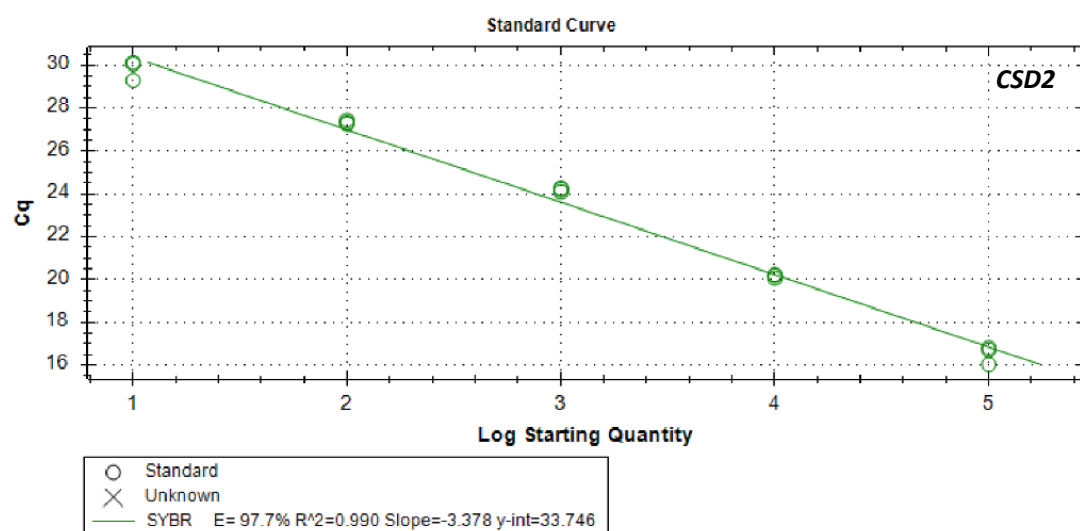

**Figure S2.** Standard curves of the candidate reference genes and target genes. PCR amplification efficiency (E) and correlation coefficient ( $R^2$ ) of primer pairs were calculated by a standard curve with a 10-fold serial dilution of the first-strand cDNA (0.05  $\mu\text{g}/\mu\text{L}$ ).
