# Supplementary material for: Identification of Reference Genes for RT-qPCR Analysis in Gleditsia microphylla under Abiotic Stress and Hormone Treatment
Source: Genes (Basel). 2022 Jul 10;13(7):1227. doi: 10.3390/genes13071227 (PMC9315665; doi:10.3390/genes13071227)
Supplement: Supplementary file 1 [file genes-13-01227-s001.zip]

Archive with 7 entries (7 files):
- Figure S1 Melting curves for the candidate reference genes and target genes.pdf
- Figure S2 Standard curves of the candidate reference genes and target genes.pdf
- Figure S3 Average expression stability M value of nine candidate reference genes calculated using GeNorm by organ.pdf
- Figure S4 The pairwise variation (V) measure of the nine candidate reference genes using GeNorm by group.pdf
- Table S1 Information of candidate reference genes, target genes and primers for RT-qPCR.pdf
- Table S2 Ct values for nine candidate reference genes under different abiotic stresses or hormone treatments.pdf
- Table S3 Expression stability ranking of the nine candidate reference genes estimated by four software.xlsx
