# Supplementary material for: Identification of Reference Genes for RT-qPCR Analysis in Gleditsia microphylla under Abiotic Stress and Hormone Treatment
Source: Genes (Basel). 2022 Jul 10;13(7):1227. doi: 10.3390/genes13071227 (PMC9315665; doi:10.3390/genes13071227)
Supplement: Supplementary file 1 [file genes-13-01227-s001.zip › Table S3 Expression stability ranking of the nine candidate reference genes estimated by four software.xlsx]

## Sheet: sheet1
Table S3. Expression stability ranking of the nine candidate reference genes estimated by geNorm, NormFinder, BestKeeper and RefFinder
Group	Organ	Stability (High-Low)
		Method	1	2	3	4	5	6	7	8	9
Cold	RSL	BestKeeper	TUB1	EIF4A1	EF-1α	CBP20	ACT7	TBP1	eIF2	GAPB	GAPA
		NormFinder	eIF2	TBP1	EIF4A1	CBP20	ACT7	TUB1	EF-1α	GAPB	GAPA
		GeNorm	TBP1 | eIF2		CBP20	EIF4A1	TUB1	ACT7	EF-1α	GAPB	GAPA
		RefFinder	TBP1	eIF2	EIF4A1	TUB1	CBP20	ACT7	EF-1α	GAPB	GAPA
	R	BestKeeper	CBP20	TUB1	TBP1	EIF4A1	eIF2	GAPB	GAPA	ACT7	EF-1α
		Normfinder	eIF2	TUB1	TBP1	GAPB	CBP20	EIF4A1	ACT7	GAPA	EF-1α
		Genorm	TBP1 | TUB1		eIF2	GAPB	CBP20	EIF4A1	GAPA	ACT7	EF-1α
		RefFinder	TBP1	TUB1	eIF2	CBP20	GAPB	EIF4A1	GAPA	ACT7	EF-1α
	S	BestKeeper	CBP20	eIF2	EIF4A1	EF-1α	GAPB	TUB1	TBP1	GAPA	ACT7
		Normfinder	CBP20	EF-1α	eIF2	EIF4A1	GAPA	GAPB	TUB1	TBP1	ACT7
		Genorm	EF-1α | eIF2		EIF4A1	GAPA	TBP1	CBP20	TUB1	GAPB	ACT7
		RefFinder	EF-1α	eIF2	CBP20	EIF4A1	GAPA	TBP1	GAPB	TUB1	ACT7
	L	BestKeeper	GAPA	CBP20	eIF2	TBP1	TUB1	GAPB	EIF4A1	ACT7	EF-1α
		Normfinder	TUB1	GAPB	EIF4A1	eIF2	GAPA	TBP1	ACT7	EF-1α	CBP20
		Genorm	TBP1 | eIF2		GAPA	TUB1	GAPB	EIF4A1	CBP20	ACT7	EF-1α
		RefFinder	TUB1	eIF2	GAPA	GAPB	TBP1	EIF4A1	CBP20	ACT7	EF-1α
Heat	RSL	BestKeeper	EIF4A1	CBP20	TUB1	TBP1	EF-1α	ACT7	eIF2	GAPB	GAPA
		NormFinder	eIF2	TBP1	TUB1	CBP20	EF-1α	EIF4A1	ACT7	GAPB	GAPA
		GeNorm	TBP1 | eIF2		CBP20	EIF4A1	TUB1	EF-1α	ACT7	GAPB	GAPA
		RefFinder	eIF2	TBP1	EIF4A1	CBP20	TUB1	EF-1α	ACT7	GAPB	GAPA
	R	BestKeeper	EIF4A1	TBP1	GAPA	eIF2	GAPB	CBP20	TUB1	EF-1α	ACT7
		Normfinder	eIF2	GAPA	GAPB	TUB1	EIF4A1	TBP1	EF-1α	ACT7	CBP20
		Genorm	TBP1 | EIF4A1		GAPA	eIF2	GAPB	TUB1	EF-1α	ACT7	CBP20
		RefFinder	eIF2	EIF4A1	GAPA	TBP1	GAPB	TUB1	EF-1α	CBP20	ACT7
	S	BestKeeper	GAPA	eIF2	EIF4A1	TBP1	CBP20	TUB1	GAPB	EF-1α	ACT7
		Normfinder	eIF2	TBP1	GAPA	GAPB	CBP20	EIF4A1	TUB1	EF-1α	ACT7
		Genorm	CBP20 | GAPA		eIF2	TBP1	EIF4A1	TUB1	GAPB	EF-1α	ACT7
		RefFinder	eIF2	GAPA	TBP1	CBP20	EIF4A1	GAPB	TUB1	EF-1α	ACT7
	L	BestKeeper	GAPA	TBP1	GAPB	TUB1	eIF2	EIF4A1	CBP20	ACT7	EF-1α
		Normfinder	TUB1	TBP1	eIF2	EIF4A1	GAPB	GAPA	ACT7	CBP20	EF-1α
		Genorm	TBP1 | eIF2		EIF4A1	TUB1	GAPB	GAPA	CBP20	ACT7	EF-1α
		RefFinder	TBP1	TUB1	eIF2	GAPA	GAPB	EIF4A1	CBP20	ACT7	EF-1α
PEG	RSL	BestKeeper	EF-1α	EIF4A1	ACT7	TBP1	TUB1	CBP20	eIF2	GAPB	GAPA
		NormFinder	TBP1	EIF4A1	CBP20	TUB1	ACT7	eIF2	GAPB	GAPA	EF-1α
		GeNorm	TBP1 | EIF4A1		CBP20	TUB1	ACT7	eIF2	GAPB	GAPA	EF-1α
		RefFinder	EIF4A1	TBP1	CBP20	TUB1	ACT7	EF-1α	eIF2	GAPB	GAPA
	R	BestKeeper	GAPB	EIF4A1	CBP20	TBP1	eIF2	ACT7	GAPA	EF-1α	TUB1
		Normfinder	GAPB	eIF2	EIF4A1	TBP1	CBP20	GAPA	ACT7	EF-1α	TUB1
		Genorm	EIF4A1 | eIF2		GAPB	TBP1	ACT7	CBP20	GAPA	EF-1α	TUB1
		RefFinder	GAPB	EIF4A1	eIF2	TBP1	CBP20	ACT7	GAPA	EF-1α	TUB1
	S	BestKeeper	EF-1α	TBP1	ACT7	eIF2	EIF4A1	GAPB	TUB1	CBP20	GAPA
		Normfinder	EIF4A1	eIF2	GAPB	ACT7	TBP1	TUB1	CBP20	GAPA	EF-1α
		Genorm	CBP20 | GAPA		TUB1	GAPB	EIF4A1	eIF2	ACT7	TBP1	EF-1α
		RefFinder	EIF4A1	eIF2	GAPB	ACT7	CBP20	TBP1	GAPA	TUB1	EF-1α
	L	BestKeeper	eIF2	TBP1	TUB1	GAPB	GAPA	EIF4A1	CBP20	ACT7	EF-1α
		Normfinder	TUB1	EIF4A1	GAPB	TBP1	eIF2	GAPA	CBP20	ACT7	EF-1α
		Genorm	EIF4A1 | TUB1		GAPB	TBP1	eIF2	GAPA	CBP20	ACT7	EF-1α
		RefFinder	TUB1	EIF4A1	GAPB	TBP1	eIF2	GAPA	CBP20	ACT7	EF-1α
CuSO4	RSL	BestKeeper	CBP20	EF-1α	EIF4A1	TBP1	TUB1	ACT7	GAPB	eIF2	GAPA
		NormFinder	ACT7	TBP1	GAPB	TUB1	EF-1α	EIF4A1	eIF2	CBP20	GAPA
		GeNorm	EF-1α | EIF4A1		TBP1	ACT7	TUB1	CBP20	GAPB	eIF2	GAPA
		RefFinder	TBP1	EF-1α	ACT7	EIF4A1	CBP20	TUB1	GAPB	eIF2	GAPA
	R	BestKeeper	EF-1α	TBP1	GAPB	ACT7	TUB1	eIF2	EIF4A1	GAPA	CBP20
		Normfinder	TBP1	EF-1α	eIF2	GAPB	EIF4A1	TUB1	ACT7	GAPA	CBP20
		Genorm	TBP1 | EF-1α		GAPB	eIF2	EIF4A1	TUB1	ACT7	GAPA	CBP20
		RefFinder	TBP1	EF-1α	GAPB	eIF2	EIF4A1	TUB1	ACT7	GAPA	CBP20
	S	BestKeeper	GAPB	eIF2	EIF4A1	GAPA	EF-1α	TBP1	TUB1	CBP20	ACT7
		Normfinder	GAPA	GAPB	eIF2	TBP1	EIF4A1	TUB1	EF-1α	CBP20	ACT7
		Genorm	eIF2 | GAPB		EIF4A1	GAPA	TBP1	TUB1	CBP20	EF-1α	ACT7
		RefFinder	GAPB	eIF2	GAPA	EIF4A1	TBP1	TUB1	EF-1α	CBP20	ACT7
	L	BestKeeper	EF-1α	GAPB	ACT7	TBP1	TUB1	CBP20	GAPA	eIF2	EIF4A1
		Normfinder	CBP20	EF-1α	eIF2	ACT7	TBP1	GAPB	TUB1	GAPA	EIF4A1
		Genorm	ACT7 | GAPB		TBP1	CBP20	eIF2	EF-1α	TUB1	GAPA	EIF4A1
		RefFinder	CBP20	ACT7	EF-1α	GAPB	TBP1	eIF2	TUB1	GAPA	EIF4A1
NaCl	RSL	BestKeeper	TBP1	CBP20	EF-1α	EIF4A1	TUB1	ACT7	eIF2	GAPB	GAPA
		NormFinder	TBP1	eIF2	EIF4A1	CBP20	TUB1	ACT7	GAPB	EF-1α	GAPA
		GeNorm	TBP1 | CBP20		eIF2	EIF4A1	TUB1	ACT7	EF-1α	GAPB	GAPA
		RefFinder	TBP1	CBP20	eIF2	EIF4A1	TUB1	ACT7	EF-1α	GAPB	GAPA
	R	BestKeeper	GAPA	TUB1	EIF4A1	TBP1	eIF2	GAPB	CBP20	EF-1α	ACT7
		Normfinder	EIF4A1	eIF2	GAPB	TUB1	GAPA	TBP1	EF-1α	CBP20	ACT7
		Genorm	GAPA | TUB1		EIF4A1	TBP1	eIF2	GAPB	EF-1α	CBP20	ACT7
		RefFinder	EIF4A1	GAPA	TUB1	eIF2	GAPB	TBP1	EF-1α	CBP20	ACT7
	S	BestKeeper	GAPA	TBP1	GAPB	TUB1	CBP20	ACT7	eIF2	EF-1α	EIF4A1
		Normfinder	TBP1	eIF2	EF-1α	GAPB	CBP20	GAPA	ACT7	EIF4A1	TUB1
		Genorm	EF-1α | eIF2		ACT7	GAPB	EIF4A1	TBP1	GAPA	CBP20	TUB1
		RefFinder	eIF2	TBP1	EF-1α	GAPB	GAPA	ACT7	CBP20	EIF4A1	TUB1
	L	BestKeeper	eIF2	TBP1	GAPB	GAPA	CBP20	TUB1	ACT7	EF-1α	EIF4A1
		Normfinder	eIF2	TBP1	GAPB	TUB1	GAPA	EIF4A1	CBP20	EF-1α	ACT7
		Genorm	TBP1 | eIF2		GAPA	CBP20	GAPB	TUB1	EF-1α	EIF4A1	ACT7
		RefFinder	eIF2	TBP1	GAPB	GAPA	TUB1	CBP20	EIF4A1	EF-1α	ACT7
ABA	RSL	BestKeeper	TUB1	TBP1	ACT7	CBP20	EF-1α	EIF4A1	eIF2	GAPB	GAPA
		NormFinder	EF-1α	EIF4A1	eIF2	TBP1	CBP20	TUB1	GAPB	ACT7	GAPA
		GeNorm	EF-1α | EIF4A1		TBP1	CBP20	TUB1	ACT7	eIF2	GAPB	GAPA
		RefFinder	EF-1α	EIF4A1	TBP1	TUB1	CBP20	eIF2	ACT7	GAPB	GAPA
	R	BestKeeper	CBP20	TBP1	TUB1	EIF4A1	EF-1α	ACT7	GAPB	eIF2	GAPA
		Normfinder	ACT7	EF-1α	EIF4A1	TBP1	GAPB	CBP20	eIF2	TUB1	GAPA
		Genorm	ACT7 | EF-1α		EIF4A1	TBP1	CBP20	GAPB	TUB1	eIF2	GAPA
		RefFinder	EF-1α	ACT7	EIF4A1	TBP1	CBP20	GAPB	TUB1	eIF2	GAPA
	S	BestKeeper	eIF2	TBP1	GAPB	ACT7	TUB1	EF-1α	EIF4A1	CBP20	GAPA
		Normfinder	GAPB	EF-1α	eIF2	TUB1	TBP1	EIF4A1	CBP20	GAPA	ACT7
		Genorm	TBP1 | eIF2		GAPB	EF-1α	TUB1	EIF4A1	CBP20	GAPA	ACT7
		RefFinder	GAPB	eIF2	TBP1	EF-1α	TUB1	EIF4A1	CBP20	ACT7	GAPA
	L	BestKeeper	GAPB	EF-1α	eIF2	EIF4A1	TUB1	TBP1	ACT7	CBP20	GAPA
		Normfinder	EF-1α	GAPB	eIF2	TBP1	TUB1	EIF4A1	ACT7	CBP20	GAPA
		Genorm	EIF4A1 | TUB1		GAPB	EF-1α	eIF2	ACT7	TBP1	CBP20	GAPA
		RefFinder	GAPB	EF-1α	eIF2	TUB1	EIF4A1	TBP1	ACT7	CBP20	GAPA
MeJA	RSL	BestKeeper	TUB1	EIF4A1	TBP1	EF-1α	ACT7	CBP20	eIF2	GAPB	GAPA
		NormFinder	eIF2	TBP1	ACT7	EIF4A1	CBP20	EF-1α	TUB1	GAPB	GAPA
		GeNorm	ACT7 | EIF4A1		EF-1α	TUB1	TBP1	CBP20	eIF2	GAPB	GAPA
		RefFinder	ACT7	EIF4A1	TBP1	TUB1	eIF2	EF-1α	CBP20	GAPB	GAPA
	R	BestKeeper	TUB1	ACT7	GAPB	EF-1α	eIF2	TBP1	EIF4A1	GAPA	CBP20
		Normfinder	TUB1	GAPB	eIF2	TBP1	EIF4A1	EF-1α	GAPA	ACT7	CBP20
		Genorm	ACT7 | EF-1α		GAPB	TUB1	EIF4A1	eIF2	TBP1	GAPA	CBP20
		RefFinder	TUB1	GAPB	ACT7	EF-1α	eIF2	TBP1	EIF4A1	GAPA	CBP20
	S	BestKeeper	eIF2	ACT7	TUB1	GAPB	EF-1α	GAPA	EIF4A1	CBP20	TBP1
		Normfinder	GAPB	eIF2	TUB1	GAPA	TBP1	CBP20	EIF4A1	EF-1α	ACT7
		Genorm	eIF2 | TUB1		GAPB	GAPA	EIF4A1	CBP20	TBP1	EF-1α	ACT7
		RefFinder	eIF2	GAPB	TUB1	GAPA	EIF4A1	ACT7	CBP20	TBP1	EF-1α
	L	BestKeeper	TUB1	EIF4A1	eIF2	GAPB	TBP1	ACT7	EF-1α	CBP20	GAPA
		Normfinder	TUB1	GAPB	EIF4A1	TBP1	eIF2	ACT7	CBP20	GAPA	EF-1α
		Genorm	EIF4A1 | TUB1		eIF2	GAPB	TBP1	CBP20	GAPA	ACT7	EF-1α
		RefFinder	TUB1	EIF4A1	GAPB	eIF2	TBP1	ACT7	CBP20	GAPA	EF-1α
SA	RSL	BestKeeper	ACT7	TBP1	TUB1	EF-1α	EIF4A1	CBP20	eIF2	GAPB	GAPA
		NormFinder	EIF4A1	CBP20	eIF2	TBP1	TUB1	ACT7	EF-1α	GAPB	GAPA
		GeNorm	CBP20 | EIF4A1		TUB1	TBP1	ACT7	EF-1α	eIF2	GAPB	GAPA
		RefFinder	EIF4A1	CBP20	TBP1	ACT7	TUB1	eIF2	EF-1α	GAPB	GAPA
	R	BestKeeper	GAPB	ACT7	TBP1	eIF2	EIF4A1	TUB1	EF-1α	CBP20	GAPA
		Normfinder	GAPB	eIF2	TUB1	EIF4A1	TBP1	CBP20	GAPA	ACT7	EF-1α
		Genorm	eIF2 | GAPB		TBP1	EIF4A1	TUB1	CBP20	GAPA	ACT7	EF-1α
		RefFinder	GAPB	eIF2	EIF4A1	TBP1	TUB1	ACT7	CBP20	GAPA	EF-1α
	S	BestKeeper	TBP1	TUB1	EF-1α	ACT7	EIF4A1	CBP20	GAPA	GAPB	eIF2
		Normfinder	TUB1	EIF4A1	CBP20	GAPB	GAPA	ACT7	eIF2	EF-1α	TBP1
		Genorm	CBP20 | GAPA		GAPB	EIF4A1	TUB1	eIF2	ACT7	EF-1α	TBP1
		RefFinder	TUB1	EIF4A1	CBP20	GAPA	GAPB	TBP1	ACT7	EF-1α	eIF2
	L	BestKeeper	eIF2	ACT7	GAPB	TUB1	EF-1α	EIF4A1	GAPA	CBP20	TBP1
		Normfinder	eIF2	ACT7	GAPB	GAPA	CBP20	TBP1	EIF4A1	EF-1α	TUB1
		Genorm	ACT7 | eIF2		GAPB	GAPA	CBP20	TBP1	EIF4A1	EF-1α	TUB1
		RefFinder	eIF2	ACT7	GAPB	GAPA	CBP20	TBP1	EIF4A1	EF-1α	TUB1
Total	RSL	BestKeeper	CBP20	EIF4A1	TUB1	TBP1	EF-1α	ACT7	eIF2	GAPB	GAPA
		NormFinder	TBP1	EIF4A1	eIF2	CBP20	TUB1	ACT7	EF-1α	GAPB	GAPA
		GeNorm	TBP1 | CBP20		EIF4A1	TUB1	ACT7	EF-1α	eIF2	GAPB	GAPA
		RefFinder	TBP1	CBP20	EIF4A1	TUB1	eIF2	ACT7	EF-1α	GAPB	GAPA
	R	BestKeeper	TBP1	GAPB	EIF4A1	CBP20	TUB1	GAPA	eIF2	ACT7	EF-1α
		NormFinder	TBP1	EIF4A1	GAPB	TUB1	GAPA	eIF2	ACT7	CBP20	EF-1α
		GeNorm	TBP1 | EIF4A1		GAPB	TUB1	GAPA	CBP20	eIF2	ACT7	EF-1α
		RefFinder	TBP1	EIF4A1	GAPB	TUB1	GAPA	CBP20	eIF2	ACT7	EF-1α
	S	BestKeeper	TBP1	CBP20	GAPB	GAPA	eIF2	EIF4A1	TUB1	EF-1α	ACT7
		NormFinder	GAPB	EIF4A1	TUB1	TBP1	GAPA	CBP20	eIF2	EF-1α	ACT7
		GeNorm	CBP20 | EIF4A1		GAPA	GAPB	TUB1	TBP1	eIF2	EF-1α	ACT7
		RefFinder	GAPB	EIF4A1	CBP20	TBP1	GAPA	TUB1	eIF2	EF-1α	ACT7
	L	BestKeeper	GAPB	CBP20	GAPA	EIF4A1	eIF2	TUB1	TBP1	EF-1α	ACT7
		NormFinder	GAPB	eIF2	TUB1	TBP1	EIF4A1	CBP20	EF-1α	GAPA	ACT7
		GeNorm	TBP1 | eIF2		GAPB	GAPA	CBP20	TUB1	EIF4A1	EF-1α	ACT7
		RefFinder	GAPB	eIF2	TBP1	CBP20	TUB1	EIF4A1	GAPA	EF-1α	ACT7
Tissue	RSLF	BestKeeper	ACT7	EF-1α	TBP1	EIF4A1	CBP20	TUB1	eIF2	GAPB	GAPA
		NormFinder	EIF4A1	TBP1	eIF2	TUB1	ACT7	CBP20	EF-1α	GAPB	GAPA
		GeNorm	TBP1 | EIF4A1		TUB1	CBP20	ACT7	eIF2	EF-1α	GAPB	GAPA
		RefFinder	EIF4A1	TBP1	ACT7	TUB1	eIF2	EF-1α	CBP20	GAPB	GAPA
	R	BestKeeper	GAPB	eIF2	ACT7	GAPA	TBP1	CBP20	EIF4A1	TUB1	EF-1α
		NormFinder	TBP1	GAPB	EIF4A1	ACT7	TUB1	GAPA	EF-1α	CBP20	eIF2
		GeNorm	EIF4A1 | TUB1		TBP1	GAPB	ACT7	EF-1α	GAPA	CBP20	eIF2
		RefFinder	TBP1	GAPB	EIF4A1	TUB1	ACT7	GAPA	eIF2	EF-1α	CBP20
	S	BestKeeper	EF-1α	eIF2	ACT7	EIF4A1	TBP1	CBP20	GAPA	TUB1	GAPB
		NormFinder	EIF4A1	eIF2	TBP1	GAPA	CBP20	GAPB	ACT7	EF-1α	TUB1
		GeNorm	TBP1 | GAPA		eIF2	EIF4A1	CBP20	GAPB	EF-1α	ACT7	TUB1
		RefFinder	EIF4A1	TBP1	eIF2	GAPA	EF-1α	CBP20	ACT7	GAPB	TUB1
	L	BestKeeper	GAPA	TBP1	CBP20	eIF2	EIF4A1	GAPB	TUB1	EF-1α	ACT7
		NormFinder	EIF4A1	eIF2	TUB1	GAPB	EF-1α	TBP1	CBP20	GAPA	ACT7
		GeNorm	TBP1 | GAPA		CBP20	eIF2	EIF4A1	TUB1	GAPB	EF-1α	ACT7
		RefFinder	EIF4A1	GAPA	TBP1	eIF2	TUB1	CBP20	EF-1α	GAPB	ACT7
	F	BestKeeper	TBP1	CBP20	GAPB	TUB1	ACT7	GAPA	EIF4A1	eIF2	EF-1α
		Normfinder	GAPB	TBP1	EIF4A1	ACT7	TUB1	CBP20	eIF2	GAPA	EF-1α
		Genorm	TBP1 | TUB1		GAPB	EIF4A1	CBP20	ACT7	eIF2	GAPA	EF-1α
		RefFinder	TBP1	GAPB	TUB1	EIF4A1	CBP20	ACT7	eIF2	GAPA	EF-1α
Note: The top four most stable genes in all groups with the number of occurrences were TBP1 for 38 times, EIF4A1 for 36 times, CBP20 for 25 times and TUB1 for 21 times, respectively. Among them, the situation of BestKeeper were TBP1 for 9 times, EIF4A1 for 8 times, CBP20 for 6 times and TUB1 for 6 times. The top four least stable genes in all groups with the number of occurrences were GAPA for 40…
